# 1 **SH3KBP1 scaffolds endoplasmic reticulum and controls skeletal** 2 **myofibers architecture and integrity**

3

4

5

6 **Alexandre Guiraud<sup>1\*</sup>, Emilie Christin<sup>1\*</sup>, Nathalie Couturier<sup>1\*</sup>, Carole Kretz-Remy<sup>1</sup>,**  
7 **Alexandre Janin<sup>1</sup>, Alireza Ghasemizadeh<sup>1</sup>, Anne-Cécile Durieux<sup>2</sup>, David Arnould<sup>2</sup>,**  
8 **Norma Beatriz Romero<sup>3</sup>, Mai Thao Bui<sup>3</sup>, Vladimir L. Buchman <sup>4</sup>, Laura Julien<sup>5</sup>, Marc**  
9 **Bitoun<sup>5</sup> and Vincent Gache<sup>1</sup>**

10

11 \* Contribute equally

12 1-U1217, UMR 5310, INMG, INSERM, CNRS, Claude Bernard University Lyon 1, France.

13 2- Laboratoire Interuniversitaire de Biologie de la Motricité, Université de Lyon, Université  
14 Jean Monnet, Saint Etienne, France.

15 3- Unité de Morphologie Neuromusculaire, Institut de Myologie, Groupe Hospitalier  
16 Universitaire La Pitié-Salpêtrière, Paris, France.

17 4- School of Biosciences, Cardiff University, Museum Avenue, Cardiff, CF10 3AX, UK.

18 5- Sorbonne Université, INSERM, , Institute of Myology, Centre of Research in Myology, UMRS  
19 974, F-75013, Paris, France.

20

21

## 22 **Summary**

23

24 Myonuclei are actively positioned throughout muscular development. Guiraud, Christin, Couturier *et al* show that  
25 SH3KBP1 scaffolds the ER through Calnexin interaction and controls myonuclei motion during early steps of  
26 muscle fibers formation. Besides SH3KBP1 participates in cell fusion and T-tubules formation/maintenance in  
27 mature skeletal muscle fibers and contributes to slow-down CNM-like phenotypes.

28

## 29 **Abstract**

30

31 The building block of skeletal muscle is the multinucleated muscle fiber, formed by the fusion of hundreds of  
32 mononucleated precursor cells, myoblasts. In the normal course of muscle fiber development or regeneration,

33 myonuclei are actively positioned throughout muscular development and adopt special localization in mature  
34 fibers: regular spacing along muscle fibers periphery, raising the notion of MyoNuclear Domains (MNDs). There  
35 is now growing support for a direct connection between myonuclear positioning and normal function of muscles,  
36 but how myonuclei affects muscle function remains poorly characterized.

37 To identify new factors regulating forces applied on myonuclei in muscles fibers, we performed a siRNA screen  
38 and identified SH3KBP1 as a new factor controlling myonuclear positioning in early phases of myofibers  
39 formation. Depletion of SH3KBP1 induces a reset of MNDs establishment in mature fibers reflected by a dramatic  
40 reduction in pairwise distance between myonuclei. We show that SH3KBP1 scaffolds Endoplasmic Reticulum  
41 (ER) in myotubes that in turn controls myonuclei velocity and localization and thus myonuclear domains  
42 settings. Additionally, we show that in later phases of muscle maturation, SH3KBP1 contributes to the formation  
43 and maintenance of Sarcoplasmic Reticulum (SR) and Transverse-tubules (T-tubules). We also demonstrate that  
44 in muscle fibers, GTPase dynamin-2 (DNM2) binds to SH3 domains of SH3KBP1. Interestingly, we observed that  
45 *Sh3kbp1* mRNA is up regulated in a mouse model harboring the most frequent mutation for Autosomal Dominant  
46 CentroNuclear Myopathy (AD-CNM): *Dnm2*<sup>+/<sup>R465W</sup>. SH3KBP1 thus appears as a compensation mechanism in this  
47 CNM model since its depletion contributes to an increase of CNM-like phenotypes (reduction of muscle fibers  
48 Cross-section Areas (CSA) and increase in slow fibers content).</sup>

49 Altogether our results identify SH3KBP1 as a new regulator of myonuclear domains establishment in the early  
50 phase of muscle fibers formation through ER scaffolding and later in myofibers integrity through T-tubules  
51 scaffolding/maintenance.

52

## 53 **Introduction**

54

55 The building block of skeletal muscle is the multinucleated muscle fiber, formed by the fusion of hundreds of  
56 specialized cells, myoblasts, and in which positioning of nuclei (“myonuclei”) is finely regulated. In the normal  
57 course of muscle development or regeneration, myonuclei actively localize themselves and adopt specific  
58 position in mature myofibers in which they are regularly spaced at the periphery of myofibers (Bruusgaard *et al*,  
59 2003). This precise myonuclei spatial organization gives rise to the notion of MyoNuclear Domains (MNDs) in  
60 which each myonucleus controls genes expression in its surrounding cytoplasm and guaranties muscle function  
61 (Gundersen, 2016). MNDs settings mainly depend on muscle fibers ability to maintain a defined distance  
62 between myonuclei in a cytoplasmic-adapted context related to myofibers type, size and age (Bruusgaard *et al*,  
63 2006; Qaisar & Larsson, 2014; Liu *et al*, 2009). During the first steps of muscle fibers formation, myonuclei have  
64 been shown to move and position using mainly microtubule network reorganization (Tassin *et al*, 1985; Gimpel  
65 *et al*, 2017) and an interplay between microtubule associated proteins (MAPs) such as MAP7 (Metzger *et al*,  
66 2012) and molecular motors, including dynein and kinesins (Gache *et al*, 2017). This dynamic of myonuclei  
67 contributes to precocious alignment of myonuclei in immature fibers. Although comprehension of mechanisms  
68 involved in myonuclear positioning during myofibers formation has recently progressed, how mispositioning of  
69 myonuclei affects muscle function still remains an open question.

70 Abnormal myonuclei internalization in muscle fibers that are not directly linked to excessive regenerative  
71 process is the hallmark of a group of humans myopathies called Centronuclear Myopathies (CNMs)(Romero &

72 Bitoun, 2011; Jungbluth *et al*, 2007). The majority of defective proteins implicated in CNMs are involved in  
73 various aspects of membrane trafficking and remodeling and are relevant to essential cellular processes  
74 including endocytosis, intracellular vesicle trafficking and autophagy (Romero & Laporte, 2013). To date, the  
75 main proteins implicated in CNMs are phosphatidylinositol phosphatase Myotubularin coded by *MTM1* gene  
76 (Laporte *et al*, 1996); GTPase dynamin-2 involved in endocytosis and cell motility, and coded by *DNM2* gene  
77 (Bitoun *et al*, 2005); amphiphysin-2 nucleocytoplasmic adaptor protein, coded by *BIN1* gene (Nicot *et al*, 2007)  
78 and the principal sarcoplasmic reticulum calcium release channel, ryanodine receptor 1, coded by *RYR1* gene  
79 (Wilmshurst *et al*, 2010; Bevilacqua *et al*, 2011).

80 Myonuclei spatial organization can contribute to muscle fibers functionality as growing evidences support a  
81 direct connection between myonuclear positioning and normal function of muscles (Metzger *et al*, 2012; Falcone  
82 *et al*, 2014; Janin & Gache, 2018; Robson *et al*, 2016). Additionally, T-tubule organization and efficiency are  
83 highly impacted in CNM (Chin *et al*, 2015; Al-Qusairi *et al*, 2009). Finally, besides abnormal nuclear positioning  
84 and T-tubules abnormalities, altered autophagy is frequently described in CNM (Jungbluth & Gautel, 2014).

85 SH3KBP1, also known as Ruk/CIN85 (Cbl-interacting protein of 85 kDa) is a ubiquitously expressed adaptor  
86 protein, involved in multiple cellular processes including signal transduction, vesicle-mediated transport and  
87 cytoskeleton remodeling (Havrylov *et al*, 2010; Buchman *et al*, 2002). SH3KBP1 protein is composed of three  
88 SH3 domains at the N-terminus followed by a proline-rich (PR) domain, a serine-rich (SR) domain, and a C-  
89 terminus coiled-coil (CC) domain. Functions of SH3KBP1 as an adaptor protein are mainly linked to endocytosis  
90 trafficking and degradative pathway through the recruitment of Cbl (E3 ubiquitin ligase), endophilin and  
91 dynamin (Schroeder *et al*, 2010; Sun *et al*, 2015; Zhang *et al*, 2009). SH3KBP1 protein is also associated with  
92 several compartments involved in membrane trafficking such as the Golgi complex and is mainly concentrated in  
93 COPI-positive subdomains (Havrylov *et al*, 2008). The role of SH3KBP1 during the formation of muscle fibers has  
94 never been investigated.

95 In the present study, we show that the adaptor protein SH3KBP1, through its N-terminus part, is able to scaffold  
96 endoplasmic reticulum (ER) probably *via* an interaction with Calnexin. SH3KBP1 also governs myonuclei motion  
97 and spatial organization as well as myoblast fusion. Additionally, we observed that SH3KBP1 interacts with  
98 Dynamin 2 (DNM2) and organizes T-tubule formation in skeletal muscle. Moreover, its down-regulation  
99 contributes to an increase of CNM-like phenotypes in a mouse model expressing the most frequent mutation  
100 causing autosomal dominant centronuclear myopathy (AD-CNM).

101

## 102 **Results**

103 **SH3KBP1 is required for precocious myonuclear positioning steps and controls fusion parameters**  
104 **during muscle fiber formation.**

105

106 To identify new factors that contribute to myonuclear spreading and alignment in muscle fibers, we performed a  
107 large siRNA screen on candidates expected to affect myonuclei repartition in nascent myotubes. Briefly, primary  
108 myoblasts were isolated from young pups and induced to differentiate *in vitro* for 3 days before analysis (Falcone  
109 *et al*, 2014) (Fig.1A). This cell culture technique leads to an accumulation of heterogeneous myotubes regarding

110 myonuclei number and myotubes length (Blondelle *et al*, 2015). To precisely characterize the early steps of  
111 myonuclei positioning in myotubes, we developed an image-J® plugin that automatically extracts different  
112 myotubes parameters (such as myotubes lengths/areas and myonucleus localization). Data were then classified  
113 and analyzed according to myonuclei content using a homemade program in R-Studio® (Fig.1D-F). This analysis  
114 allowed us to track myonuclei accretion during elongation of myotubes in a window from 3 to 11 myonuclei per  
115 myotubes. Isolated murine myoblasts were then treated with short interfering RNA (siRNA) targeting either a  
116 scrambled sequence or candidate genes. Among candidates from the siRNA screen, efficient *sh3kbp1* depletion  
117 appears to strongly modify myonuclear positioning (Fig1. B-C, Fig.S1A). In control condition, we observed a  
118 nearly linear relation between addition of myonuclei into myotubes and expansion of myotubes length, with an  
119 average of nearly 10 % increase of length after each myonucleus accretion (Fig. 1D). In *sh3kbp1* depleted  
120 myotubes, length repartition is homogeneously extended to an increase of 46.8% ±3.3 in myotubes containing up  
121 to 11 myonuclei (Fig. 1D). Quantification of the mean distance between all myonuclei inside myotubes indicate a  
122 burst of spacing (+103.5% ±11.6, data not shown) concomitantly with an escape from the center of myotubes  
123 reflected by (i) the mean distance between myotube centroid and each myonuclei (DMcM) (+111.5% ±12.5) (Fig.  
124 1E) and (ii) the Myonuclei Spreading Graphic (MSG) representation (Fig. 1F). MSG shows statistical probability  
125 to find one myonucleus along the all length of myotubes and allow the extraction of “statistical clustering zones”  
126 (colors code in Fig. 1F) that we estimate as four zones in the case of scramble myotubes *versus* eight zones in  
127 *sh3kbp1* depleted myotubes (Fig. 1F). Thus, *sh3kbp1* depleted myotubes failed to homogeneously spread  
128 myonuclei along myotubes length that tends to accumulate at myotubes tips (Fig. 1C, arrows). Overall, these data  
129 suggest that for a defined myonuclei content in myotubes, SH3KBP1 acts as “anti-elongation” factor and  
130 contributes to myonuclei spreading in myotubes.

131 Myoblasts/myotubes elongation and alignment is a key process that controls myoblast/myotubes fusion (Louis  
132 *et al*, 2008). As *sh3kbp1* depletion led to myotubes length increase, we wondered if fusion aspects were modified  
133 during differentiation. Indeed, myotubes elongation can contribute to increase myotubes/myoblast contacts that  
134 thus will modulate membrane fusion and ultimately modify myonuclei accretion speed (Kim *et al*, 2015). We  
135 evaluated fusion capacity of primary myoblasts isolated from young pups after *in vitro* differentiation induction  
136 (Fig.S1B-G). After 3 days of differentiation, isolated myoblasts treated with siRNA targeting *sh3kbp1* mRNA are  
137 similarly stained for myosin heavy chain antibodies compare to control cells treated with siRNA scramble  
138 sequences, indicating normal myoblast commitment into muscle differentiation process (Fig. S1B-D). Fusion  
139 index was increased in *Sh3kbp1* depleted myotubes, assessed by the total number of myonuclei in myotubes (Fig.  
140 S2E) and the average number of myonuclei per myotube (Fig. S2F). Accordingly, in *sh3kbp1* depleted conditions,  
141 distribution of myotubes with respect to myonuclei content revealed much more myotubes with ≥10 nuclei  
142 when compared to controls (Fig. S2G). Altogether, this data suggests that *sh3kbp1* acts also as an “anti-fusion”  
143 factor as expected for an anti-elongation factor.

#### 144 **SH3KBP1 governs myonuclei velocity that contributes to myonuclei positioning in mature myofibers.**

145  
146 To investigate the role of *sh3kbp1* in late steps of differentiation, primary mouse myotubes were maintained in  
147 differentiation media for 5 to 10 days as previously described (Pimentel *et al*, 2017; Falcone *et al*, 2014) Fig. 2A.



148 In 5-day differentiated myofibers, myonuclei clustering and velocity was addressed (Fig. 2B-F). First, we  
149 observed twice more myonuclei clustered in myotubes treated with shRNA targeting *sh3kbp1* gene compared to  
150 control, confirming a role of *sh3kbp1* on myonuclei spreading (Fig. 2B & E, white asterisk). As myonuclei within  
151 myofibers have different behaviors (Gache *et al*, 2017), we next investigated the impact of *sh3kbp1* depletion on  
152 myonuclei movements in 5-day differentiated myofibers. Myoblasts were transfected with RFP-lamin-  
153 chromobody® to visualize myonuclei concomitantly with shRNA targeting scramble or *Sh3kbp1*, both GFP-  
154 tagged. Myotubes containing both constructions (GFP and RFP-lamin-chromobody®) were selected for fewer  
155 analyses (Fig.2C-F). After 5 days of differentiation, myonuclei were tracked every 20 minutes for a time period of  
156 16 hours (Fig. 2E, Supplementary video 1-2). Myonuclei displacements parameters were analyzed using SkyPad  
157 method (Cadot *et al*, 2014). We found that in control condition, myonuclei are in motion during nearly 35 % of  
158 the time (a movement is defined as a displacement more than 30  $\mu\text{m}$ ) at a median speed of  $0.232 \pm 0,014$   
159  $\mu\text{m}/\text{min}$ . Depletion of *sh3kbp1* increased from more than 20% the percentage of time myonuclei are in motion of  
160 and by more than 30% median speed that reach  $0.313 \pm 0,014$   $\mu\text{m}/\text{min}$  outside myonuclei clusters (Fig.2C-D).  
161 Indeed, because of high myonuclei concentration inside myonuclei clusters, we could not technically access to  
162 myonuclei motion and speed (Fig. 2E, Supplementary video 2). To further investigate the implication of *sh3kbp1*  
163 in late steps of differentiation, primary mouse myotubes were maintained in differentiation media for 10 days as  
164 previously described (Pimentel *et al*, 2017) (Fig. 2G). In these maturation conditions, myonuclei are compressed  
165 between myofiber plasma membrane and contractile apparatus and adopt a flatten architecture all along  
166 myofibers length (Roman *et al*, 2017). This long-term differentiation approach allow to confirm that *sh3kbp1*  
167 controls myonuclear positioning during maturation of myofibers as *sh3kbp1* depletion using either siRNA or  
168 shRNA caused a significant reduction in the mean distance between adjacent myonuclei (Fig. 2G-H). Additionally,  
169 *Sh3kbp1* depletion significantly reduces by more than 30 % myofibers width (Fig. 2I). These results suggest that  
170 SH3KBP1 contributes to nuclear spreading and to the reduction of myonuclei movements and motion during  
171 muscle fibers maturation.

172 Next, we focused on the expression of both SH3KBP1 protein and *Sh3kbp1* mRNA in the time course of *in vitro*  
173 myotubes formation using C2C12 cells. These analyses showed a slight enhancement of SH3KBP1 production  
174 during early stages of myotubes formation (Fig. 3A). These results were confirmed using RT-qPCR techniques  
175 where a two-fold increase was observed in mRNA expression at the onset of differentiation step (Fig3B-C). To  
176 confirm *Sh3kbp1* functions during muscle cell differentiation, we stably knocked-down *Sh3kbp1* mRNA  
177 expression in C2C12 cells using a small hairpin interfering RNA (shRNA) (Fig. 3D). As observed in primary cells,  
178 after 3 days of differentiation, myoblasts entered the “muscle differentiation program”, illustrated by the  
179 detection of myosin heavy chain-positive (MHC+) cells (Fig. 3E, day3). Although intensity of staining is reduced,  
180 we do not observe any alteration of myotubes size repartition in *Sh3kbp1* knocked-down compared to control  
181 conditions (Fig. S2A). After 6 days of differentiation, we clearly see a breaking event in fusion capacity correlated  
182 with *Sh3kbp1* knockdown (Fig. 3E). In control conditions, myonuclei spread along thin myotubes length while  
183 *Sh3kbp1* knockdown gives rise to huge myotubes with clustered myonuclei areas (Fig. 3E, day6). Distribution of  
184 myotubes with respect to their myonuclei content reveals also a significant increase in the number of myotubes  
185 with high myonuclei content compared to controls (Fig. S2B). In control condition, we observed a limited  
186 accumulation of clustered myonuclei along myotubes length, with a majority of clusters containing 4 to 6

187 myonuclei (Fig. 3F). On the opposite, in *Sh3kbp1* knockdown, we observe a clear increase in the proportion of  
188 clusters containing more than 15 myonuclei (Fig. 3F). To address the specificity of myonuclei clustering  
189 phenotype in *Sh3kbp1* depleted conditions, we re-expressed full-length SH3KBP1 proteins in *Sh3kbp1* depleted  
190 murine myotubes and show that we rescue even better than in control the number of clustered myonuclei by  
191 myotubes (Fig. S2C-D). Together, these results show that *Sh3kbp1* is essential during myotube formation, both in  
192 primary myoblasts and in C2C12 cell cultures, to control myoblasts fusion and myonuclear positioning during  
193 skeletal muscle formation.

#### 194 **SH3KBP1 is an endoplasmic reticulum scaffolding protein that interacts with ER72 and Calnexin.**

195 Several studies show that SH3KBP1 is distributed between different membrane trafficking compartments such  
196 as the Golgi Complex (Havrylov *et al*, 2008). The three SH3 domains localized in the N-terminal part of SH3KBP1  
197 are responsible for its high capacity to interact with diverse regulatory partners (Havrylov *et al*, 2009) while the  
198 C-terminus part, containing a coiled-coil domain allows its targeting to endosomal membranes (Zhang *et al*,  
199 2009). As no role of SH3KBP1 was previously described in skeletal muscle, we analyzed its localization during  
200 the time course of muscle formation using both C2C12 myoblast cell line and murine primary myoblasts (Fig. 4  
201 A-B). In growing conditions, SH3KBP1 is localized in the cytoplasm with an apparent higher concentration at the  
202 vicinity of nuclei both in primary and in C2C12 myoblasts and some dots inside nucleus are also visible (Fig. 4A-  
203 B). During early myotubes formation, SH3KBP1 seems to spread along myotubes length, exhibit a weak  
204 perinuclear accumulation and myonuclei still exhibits dots inside myonuclei (Fig. 4A-B, Day3 and Day2). In 5  
205 days differentiation C2C12 myotubes, perinuclear accumulation of SH3KBP1 is stronger and we still observe  
206 some accumulation inside some myonucleus as dots or line (Fig. 4A, Day5). In primary myoblasts induced to  
207 differentiate into “mature-like” fibers organized with myonuclei at periphery, SH3KBP1 was still detected at  
208 myonuclei vicinity but more accumulated at the interface between myonuclei “bottom” and muscle fiber interior  
209 and it also exhibited longitudinal/transversal staining (Fig. 4B, Day10). We thus wondered what kind of  
210 compartments could be controlled by SH3KBP1. To answer this question, we used stable C2C12 cell-line  
211 depleted for *Sh3kbp1* to investigate altered compartment phenotypes (Fig. 4C-D). We observed that, even if  
212 myonuclei are clustered in myotubes depleted for *Sh3kbp1*, Golgi marker RCAS1 was still mainly localized  
213 around myonuclei, as previously described for Golgi elements (Fig. 4C)(Ralston *et al*, 1999). On the contrary, the  
214 ER marker ERP72 that showed perinuclear localization in control myotubes was completely dispersed in  
215 *Sh3kbp1-depleted* myotubes (Fig. 4D). This result indicates a role for *Sh3kbp1* in the upkeep of ERP72-containing  
216 ER specifically at the vicinity of myonuclei, independently of Golgi complex architecture.

217 ERP72 (also called PDIA4) is a disulfide isomerase that acts as a folding chaperone for newly synthesized  
218 secretory proteins in the ER compartment (Satoh *et al*, 2005). Endogenous ERP72 co-immunoprecipitated with  
219 exogenous full-length GFP-tagged SH3KBP1 (Fig. 4E-G). Using a panel of SH3KBP1 deletion mutants, we  
220 determined that ERP72 interacts with the C-terminal part of SH3KBP1, independently of its C-terminus coiled-  
221 coil domain (Fig. 4E-G). ERP72 is described as an intraluminal ER protein that interacts with calnexin ER-  
222 chaperone (Penga *et al*, 2014). Interestingly, the C-terminus part of Calnexin is cytosolic and thus could be the  
223 cytoplasmic linker between SH3KBP1 and ERP72-containing Endoplasmic Reticulum (Wada *et al*, 1991). We  
224 next tested if SH3KBP1 physically interacts with Calnexin (Fig. 4E-G) and observed that endogenous Calnexin, as

225 ERP72, co-immunoprecipitated with exogenous full-length GFP-tagged SH3KBP1 constructs. In addition, we also  
226 identified the C-terminal part of SH3KBP1, independently of the C-terminus coiled-coil domain as the Calnexin-  
227 interacting domain (Fig. 4E-G). Therefore, Proline-and Serine-Rich domains of SH3KBP1 mediate the interaction  
228 with ERP72-positive ER through Calnexin binding.

### 229 **SH3KBP1 progressively accumulates at the Z-line and interacts with DNM2.**

230 We next investigated SH3KBP1 localization *in vivo*, in mature myofibers from adult skeletal muscle. SH3KBP1  
231 accumulated specifically at the vicinity of myonuclei, forming a “cage” around myonuclei in *Tibialis Anterior* (TA)  
232 muscle (Fig. 5A-B, asterisks). This staining was confirmed in human muscle biopsies where we observed that  
233 myonuclei are positive for SH3KBP1 (Fig. S3G). In TA longitudinal section, SH3KBP1 exhibited a striated pattern  
234 at the I-band/Z-line zone, in between the staining of the voltage-dependent calcium channel, DHPR $\alpha$ , which  
235 labels T-tubules and forms a doublet band indicating that SH3KBP1 does not colocalize with DHPR $\alpha$  but follow,  
236 in a close proximity, T-tubules structures (Fig. 5C-E). To determine domains of SH3KBP1 responsible for this  
237 particular localization, we next tested *in vitro* expression of full-length SH3KBP1 or associated fragments into  
238 primary myoblasts induced to differentiate into “mature-like” fibers with peripheral myonuclei and proper  
239 sarcomere organization, reflected by striated actin staining (Fig. 5F-G). In this myofibers, full-length SH3KBP1  
240 was present as small aggregation patches close to myonuclei, combined with striated pattern and accumulated at  
241 the Z-line with no overlap with actin staining (Fig. 5F-G, SH3KBP1-FL). N-terminus fragment of SH3KBP1  
242 containing SH3 domains was only present as striated patterns with no particular accumulation at myonuclei  
243 vicinity, while the C-terminus SH3KBP1 fragments strongly accumulated at the periphery of muscle fibers, at the  
244 vicinity of myonuclei and at the Z-line with striated patterns (Fig. 5.F). Numerous proteins accumulate at the I-  
245 band/Z-line zone and participate in myofibers structuration (Burgoyne *et al*, 2015). Among them, Dynamin 2  
246 (DNM2), a large GTPase implicated in cytoskeleton regulation and endocytosis, was previously described in HeLa  
247 cells as a SH3KBP1 interacting protein, through its proline-rich domain (Schroeder *et al*, 2010). To this end, we  
248 expressed, in C2C12 cells, full-length GFP-tagged-DNM2 with fragments of FLAG-tagged SH3KBP1 and  
249 immunoprecipitated SH3KBP1 constructs. This experiment confirmed that DNM2 interacts with SH3KBP1  
250 through its N-terminal part (Fig. 5H-I). Therefore, in mature myotubes, SH3KBP1 accumulate at the Z-line where  
251 it forms a protein complex with DNM2.

### 252 **SH3KBP1 is required in mature fibers for the maintenance of T-tubules.**

253 We next assessed the impact of *Sh3kbp1* depletion on internal cell architecture. To this end, we used our *in vitro*  
254 model assay on mature fibers using primary myoblasts (Fig. 6A). Myofibrillogenesis in *Sh3kbp1* depletion  
255 condition was normal after 10 days of differentiation, reflected by F-actin staining (Fig. 6B). In control condition,  
256 we also observed that DHPR $\alpha$  staining which labels T-tubule, forms transversal doublet bands alternatively with  
257 actin staining (Fig. 6A). Quantification of the staining indicated that in control conditions, using either siRNA or  
258 shRNA scramble, nearly 30% of formed myofibers exhibit a transversal DHPR $\alpha$  staining, reflecting formation of  
259 mature T-tubules (Fig. 6A & C). On the contrary, in *Sh3kbp1*-depleted myofibers, DHPR $\alpha$  staining is much more  
260 punctuated, indicating the absence of mature T-tubules aligned with sarcomere structures (Fig. 6B) and  
261 suggesting a role of SH3KBP1 in T-tubule formation. Indeed, in *Sh3kbp1*-myofibers, we observed a drop of

262 myofibers with transversal staining of DHPR $\alpha$  to nearly 5% of myofibers, correlating with an increase in random  
263 DHPR $\alpha$  staining as dots along myofibers (Fig. 6C, Fig. S2E). To confirm these results we depleted *Sh3kbp1* from  
264 mature myofibers using shRNA electroporation technique directly in TA skeletal muscle of two-month-old mice  
265 (Fig. 6D). First, after 15 days of *Sh3kbp1* inhibition, an atrophic muscle fiber effect was observed in  
266 electroporated TA muscles fibers, reflected by a 35% decrease of the mean muscle fibers cross section area in  
267 *Sh3kbp1* fibers compared to controls (Fig. 6F), an effect that we previously observed *in vitro* (Fig. 2I). Moreover,  
268 T-tubule architecture appears perturbed in *Sh3kbp1* fibers, illustrated by an unequal DHPR $\alpha$  staining along  
269 fibers (Fig. 6D). Together, these results show that *Sh3kbp1* contribute to T-tubule formation and maintenance in  
270 skeletal muscle fibers.

### 271 *Sh3kbp1* is up regulated in a murine model of AD-CNM and inhibits CNM phenotypes.

272 Our data show that *Sh3kbp1* controls myonuclei dynamics and reticulum spatial organization and interacts with  
273 DNM2 which is mutated in dominant centronuclear myopathy characterized by myonuclear centralization  
274 (Romero & Bitoun, 2011). Heterozygous AD-CNM-Knock-In-*Dnm2*<sup>R465W</sup> mouse model (KI-*Dnm2*<sup>R465W/+</sup>)  
275 progressively develop muscle atrophy, impairment of contractile properties, histopathological abnormalities  
276 including slight disorganization of T-tubules and reticulum, and elevated cytosolic calcium concentration  
277 (Durieux *et al*, 2010). We first analyzed *Sh3kbp1* mRNA expression in TA skeletal muscle during mice  
278 development and aging (Fig. 7A). To our surprise, *Sh3kbp1* mRNA was progressively reduced from more than 30  
279 % in 8 months old mice compare to 2 months old mice (Fig. 7A), suggesting a progressive loss of SH3KBP1 pool  
280 during aging. More interestingly, we also showed that in this KI-*Dnm2*<sup>R465W/+</sup> model, *Sh3kbp1* mRNA is  
281 significantly up-regulated during the first 4 months of mice development (Fig. 7A), suggesting a compensation  
282 mechanism, that can explain the limited ratio of atrophic fibers and absence of centralized myonuclei in this CNM  
283 model (Durieux *et al*, 2010). To address the role of SH3KBP1 in long-term muscle homeostasis in both wild type  
284 and KI-*Dnm2*<sup>R465W</sup> mice, we investigated *in vivo* depletion of *Sh3kbp1* protein. Down-regulation of *Sh3kbp1* was  
285 achieved using intramuscular TA muscle injections of an AAV cognate vector expressing shRNA targeting  
286 *Sh3kbp1* mRNA (AAV-shSh3kbp1) either in wild type or KI-*Dnm2*<sup>R465W</sup> mice at 5 weeks of age, an age where  
287 muscle mass is nearly fully developed. This allowed addressing the role of *Sh3kbp1* specifically in adult skeletal  
288 muscle during the first three months of mice development and specifically in a period where we observed  
289 *Sh3kbp1* mRNA up-regulation in KI-*Dnm2*<sup>R465W</sup> model (Fig. 7A). In wild type mice, *Sh3kbp1* mRNA level was  
290 decreased by 2.7 fold compared to PBS-injected muscles (Fig. S3A, WT). In KI-*Dnm2*<sup>R465W</sup> mice, *Sh3kbp1* mRNA  
291 levels showed a 5.4 fold decrease compared to PBS-injected TA-muscles (Fig. S3A, WT, KI-*Dnm2*<sup>R465W</sup>). No  
292 significant change of body weight was observed between AAV-shSh3kbp1-injected and PBS-injected conditions  
293 in both genotypes (Fig. S3B). However, a significant decrease in absolute force (g) developed by TA muscles  
294 specifically in KI-*Dnm2*<sup>R465W</sup> mice depleted for *Sh3kbp1* was observed (Fig. 7D) suggesting a specific impact of  
295 *Sh3kbp1* down-regulation in the KI-*Dnm2*<sup>R465W</sup> mice model. Interestingly, we observed a significant decrease of  
296 TA muscle mass of about 20%, when *Sh3kbp1* is depleted in both WT and KI-*Dnm2*<sup>R465W</sup> mice (Fig. 7E). Cross-  
297 sectional areas of TA-muscle fibers were determined using transverse sections stained with laminin antibodies  
298 to define muscle fibers border (Fig. 7B-C). Global decrease in median myofibers area was observed in AAV-  
299 shSh3kbp1 injected TA-muscles compared to control muscles in WT (-30%) and KI-*Dnm2*<sup>R465W</sup> (-20%) mice (Fig.

300 7F). Analysis of muscle fibers area repartition showed a significant increase in atrophic fibers in AAV-shSh3kbp1  
301 injected muscles (Fig. S3C). Additionally, we observed a significant reduction of about 25% in the total number of  
302 fibers specifically in KI-*Dnm2*<sup>R465W</sup> model depleted for *Sh3kbp1* (Fig. S3D). DNM2-CNM patients exhibit a  
303 predominance of type 1 muscle fibers (Romero & Bitoun, 2011). Thus, we investigated the ratio of slow fiber  
304 types in AAV-shSh3kbp1 injected TA-muscles, reflected by the expression of myosin heavy chain type 1 (Fig. 7C-  
305 D & G). In wild type conditions, slow fiber type accounted for 5 % of total muscle fibers. We observed that in  
306 AAV-shSh3kbp1 injected muscles, this ratio was slightly increased to reach 6.4 % of total muscle fibers, which is  
307 the same as what was observed in KI-*Dnm2*<sup>R465W</sup> mice (Fig. 7G). However, when *Sh3kbp1* is depleted in KI-  
308 *Dnm2*<sup>R465W</sup> muscle, this ratio increases drastically to reach 12% of total fibers (Fig. 7G). In the Knock-in mouse  
309 model, DNM2 mutation leads to autophagy impairment (Rabai *et al*, 2019; Durieux *et al*, 2010). During  
310 autophagosome formation, LC3-I (Microtubule-associated protein 1A/1B-light chain 3) is converted to LC3-II by  
311 conjugation to phosphatidylethanolamine lipid. To assess the impact of *Sh3kbp1* depletion on autophagy, LC3-II  
312 positive fibers was determined in Sh3kbp1 depleted fibers in both WT and KI-*Dnm2*<sup>R465W</sup> mice. We observed an  
313 increase in number of LC3-II positive fibers in both genotypes but more pronounced in KI-*Dnm2*<sup>R465W</sup> mice (Fig.  
314 7H). Our *in vitro* data show that *Sh3kbp1* depletion increase fusion and alter myonuclei spreading (Fig. 1-3). We  
315 thus investigate the impact on the number of myonuclei and the ratio of internalized myonuclei by fibers in  
316 *Sh3kbp1* depleted myofibers but did not find any evidence for alteration compare to control conditions (Fig. S3E-  
317 F). Altogether, our data suggest that *Sh3kbp1* mRNA increase observed in AD-CNM model could be an attempt of  
318 compensatory mechanism as normalization of *Sh3kbp1* expression intensified muscle phenotype.

## 319 Discussion

320 Myonuclei movement's during muscle cell formation have been related to the activity of numerous microtubule  
321 binding proteins such as Motors and Maps (Gache *et al*, 2017). In immature myotubes, microtubules are  
322 organized into antiparallel arrays between adjacent myonuclei and contribute to the polarization/elongation of  
323 myotubes, alignment of myonuclei and ultimately organization of myosin filaments during sarcomere formation  
324 (Pizon *et al*, 2005; Metzger *et al*, 2012; Wang *et al*, 2013). This new orientation/architecture of the microtubule  
325 network directly influences myoblasts/myotubes fusiform shape, as microtubule network forces are applied at  
326 the extremity of polarized myotubes and also in-between myonuclei (Metzger *et al*, 2012); it also contributes to  
327 myonuclei spreading along myotubes length (Tassin *et al*, 1985). This precise myonuclei organization in muscle  
328 fibers gives rise to the formation of so-called "MyoNuclear Domains" (MNDs) wherein each myonucleus is  
329 responsible for gene expression in its surrounding cytoplasm and guaranties functional integrity of muscles  
330 (Qaisar, 2012; Liu *et al*, 2009). However, regulation of processes involved in myonuclei positioning in developing  
331 muscle fibers, not directly linked to the microtubule network, are still unknown.

332  
333 The present study demonstrates that a protein related to the endoplasmic reticulum (ER) network controls both  
334 myotubes elongation and myonuclei localization/spreading in developing myofibers, two processes that are  
335 closely linked as they both depends on microtubule network organization. Early steps of myonuclei positioning  
336 in myotubes depend on an interplay between microtubules, microtubules-associated-proteins such as MAP4,  
337 MAP7 and motors proteins such as Dynein and Kif5B (Gimpel *et al*, 2017; Mogessie *et al*, 2015; Metzger *et al*,



338 2012; Cadot *et al*, 2012; Wang *et al*, 2013; Wilson & Holzbaur, 2014a). This process also depends on myonuclei  
339 membrane associated components such as Nesprin-1 or AKAP9 (Gimpel *et al*, 2017; Wilson & Holzbaur, 2014b;  
340 Doñate Puertas *et al*, 2018). Here, we show that SH3KBP1 depletion leads to longer and thinner myotubes  
341 without significant alteration of the microtubules network compared to control (Fig. 1-3 & data not shown). We  
342 find that the C-terminus part of SH3KBP1 is associated with ERP72-positive ER probably through its binding to  
343 Calnexin (Fig. 4E-G). This association scaffolds ERP72-associated ER specifically at myonuclei vicinity, without  
344 affecting Golgi apparatus integrity (Fig. 4A-D). Recently, ER has been implicated in governing both microtubule  
345 alignment and cytoplasmic streaming (Kimura *et al*, 2017). Kimura *et al* propose that local cytoplasmic flow  
346 generated along microtubules is transmitted to neighboring regions through the ER and in turn, aligns  
347 microtubules and self-organizes the collective cytoplasmic flow. SH3KBP1, by shaping and maintaining ER  
348 clustering during myofibers development could contribute to prevent microtubules network anchoring at the  
349 nucleus membrane and thus local microtubule network organization. In this view, SH3KBP1, during myoblasts  
350 fusion process could disorganize parallel microtubules organization and thus decrease forces applied on  
351 myotubes tips extremity. This phenomenon could lead to the control of myotubes length, but also of both  
352 myonuclei motility and velocity (Fig. 2).

353 SH3KBP1 staining is diffuse in dividing cells, while it progressively accumulates at the vicinity of myonuclei  
354 during differentiation process (Fig. 4). A few proteins have been shown to form a flexible perinuclear shield that  
355 can protect myonuclei from extrinsic forces (Wang *et al*, 2015; Ghasemizadeh *et al*, 2019). To note, recent data  
356 show that disruption of one component of this perinuclear shield, MACF1 protein, increases myonuclei velocity  
357 (Ghasemizadeh *et al*, 2019). Consequently, SH3KBP1 probably belongs to the group of proteins that contribute to  
358 the stability of this perinuclear shield through the maintenance of ER at the vicinity of myonuclei. In accordance  
359 with this preferential localization at the proximity of myonuclei, SH3KBP1 staining in transversal *Tibialis*  
360 *Anterior* muscle section is very intense at myonucleus site whereas nuclei outside the fiber remains negative  
361 (Fig. 5A-B). In human muscle biopsies, this localization around myonuclei is maintained even in centralized  
362 nuclei from CNM patient (Fig. S3G). The three SH3 domains of SH3KBP1 have been shown to cluster multiple  
363 proteins and protein complexes that can also contribute to the stability of those interactions. Havrylov *et al*  
364 identified using mass spectrometry, few microtubule-binding-proteins such as MAP7 and MAP4 that can  
365 potentially interact with SH3 domains of SH3KBP1 and have already been shown to control myonuclei  
366 positioning in myotubes (Metzger *et al*, 2012; Mogessie *et al*, 2015; Havrylov *et al*, 2009). However, we failed to  
367 confirm the interaction of SH3KBP1 with either MAP7 or MAP4 in muscle cells (data not shown). Alternatively,  
368 SH3KBP1 also interacts with dynamin-2 (DNM2) and has been shown to participate in dynamics instability of  
369 microtubules (Tanabe & Takei, 2009) and microtubule nucleation (Thompson *et al*, 2004). The failure of  
370 recruiting DNM2 at the right place during myotubes formation after SH3KBP1 depletion could also contribute to  
371 the aberrant myonuclei spreading (Fig. 1). Interestingly, in CNM-KI-*Dnm2*<sup>R465W</sup> mouse model, Fongy *et al* show  
372 that myonuclei move and spread properly in heterozygous myotubes but hypothesize a defect in nuclear  
373 anchoring at the periphery (Fongy *et al*, 2019). Several studies pointed the importance of cytoskeleton, including  
374 MAPs, microtubules and intermediate filaments, in the nuclear anchorage in mature muscle (Ghasemizadeh *et al*,  
375 2019; Roman *et al*, 2017). SH3KBP1 dependent ER-scaffolding could participate in myonuclei anchoring at the  
376 periphery of myofibers and thus in the recruitment and stabilization of a network of proteins at the vicinity of



377 myonuclei. This hypothesis is supported by our data showing an increase in the percentage of the time in motion  
378 of myonuclei, in the absence of SH3KBP1 (Fig. 2D), correlated with the strong staining of myonuclei in mouse  
379 and human models (Fig. 5A & S3G).

380  
381 In mature myofibers, SH3KBP1 depletion leads to more aggregated myonuclei phenotype, suggesting that a  
382 failure in the early phases of myonuclear positioning is difficult to compensate (Fig.2G). Interestingly, *sh3kbp1*  
383 depletion in long-term primary myofibers culture induces a reduction in myofibers width (Fig. 2I). These results  
384 are confirmed *in vivo* as *sh3kbp1* down regulation in *Tibialis Anterior* muscle reduce from more than 30% the  
385 average cross section areas of myofibers (Fig. 6E-F & 7F). Moreover, SH3KBP1-depleted mature myofibers show  
386 disorganized perinuclear endoplasmic reticulum (ER) (Fig 4). Of interest, ER is one initiation site for autophagic  
387 process and ER selective autophagy (called ER-phagy or reticulophagy) has been described to control ER shape  
388 and dynamics through ER-phagy receptors that address ER portions to the autophagosomes (Grumati *et al*,  
389 2018). SH3KBP1 depletion increases the number of LC3II positives myofibers in *Tibialis Anterior* muscle (Fig.  
390 7H), suggesting a possible increase of autophagosomes number. Additionally, SH3KBP1 interacts with dynamin-  
391 2 (Fig. 5-G), which is also involved in the autophagic lysosome reformation (Schulze *et al*, 2013). This autophagy-  
392 dependent modulation of muscle homeostasis could first explain the decrease of Cross Section Area and  
393 myofibers width that we observed and ultimately the reduction of muscle myofibers (Fig. 2I, 7E-F & S3C).  
394 Interestingly, autophagy genes have been involved in muscle myonuclei positioning during *Drosophila*  
395 metamorphosis (Fujita *et al*, 2017). Whether this process is involved in SH3KBP1-dependent myonuclei  
396 positioning will be the subject of further investigations.

397  
398 SH3KBP1 depletion shows that T-tubule formation is dramatically impaired both *in vitro* and *in vivo* (Fig. 6).  
399 Myofibrils provide the contractile force under the control of the 'excitation-contraction coupling' system that  
400 includes two membranous organelles: the sarcoplasmic reticulum (SR) and Transverse (T)-tubules (Al-Qusairi &  
401 Laporte, 2011). These two-membrane systems are structurally associated to form the triads of skeletal muscle  
402 cells. SR is a complex network of specialized smooth endoplasmic reticulum, essential to transmit the electrical  
403 impulse as well as in the storage of calcium ions. SR is built from the formation and maturation of two distinct  
404 and functionally related domains: the longitudinal SR and the junctional SR that together wrap the contractile  
405 apparatus. T-tubule network is continuous with the muscle cell plasma membrane (PM) and begins from the  
406 invagination of PM in a repeated pattern at each sarcomere (Barone *et al*, 2015). These two-membrane systems  
407 are structurally associated to maintain their typical organization in muscle cells. SH3KBP1 depletion seems to  
408 alter more specifically junctional SR rather than longitudinal SR as it specifically alters transversal organization  
409 of T-tubules (Fig. 6A-C). One hypothesis, recently suggested by Quon *et al*, is that non-vesicular lipid transport  
410 and lipid biosynthesis could intersect at ER-PM membrane contact sites and would serve as a nexus,  
411 coordinating requirements in the PM for lipids with their production in the ER (Quon *et al*, 2018).

412  
413 Autosomal dominant CNM is caused by heterozygous mutations in the *DNM2* gene, which encodes the Dynamin 2  
414 (DNM2) GTPase enzyme (Romero, 2010). *DNM2*-related autosomal dominant (AD)-CNM was initially  
415 characterized as a slowly progressing muscle weakness affecting distal muscles with onset in early adulthood.

416 DNM2-R465W missense mutation represents the most frequent mutation in humans and a knock-in (KI) mouse  
417 model expressing this mutation has been generated that develops a progressive muscle weakness (Durieux *et al*,  
418 2010). Expressing DNM2-R465W mutation in mice leads to contractile impairment that precedes muscle atrophy  
419 and structural disorganization that mainly affects both mitochondria and endo/sarcoplasmic reticulum.  
420 Interestingly, CNM- KI-*Dnm2*<sup>R465W</sup> mouse model exhibits twice more *Sh3kbp1* mRNA amount in the first 4  
421 months than control mice before normalization after 8 months (Fig. 7A). Of note, this increase is concomitant  
422 with transient transcriptional activation of both ubiquitin-proteasome and autophagy pathways at 2 months of  
423 age in the TA muscle of the KI-*Dnm2* mice (Durieux *et al*, 2010). One can hypothesize that this elevated amount  
424 of *sh3kbp1* is one of the factors that limits activation of autophagy pathway activation and thus slows-down CNM  
425 associated phenotype. In accordance with this hypothesis, we find that *sh3kbp1* depletion increase CNM  
426 phenotype (Fig. 7D-H). In conclusion, increased amount of SH3KBP1 could delay the CNM phenotype  
427 development by stabilizing Triads and the braking of the autophagy response.

428  
429 Finally, our data show that *Sh3kbp1* depletion increases fusion events in transfected primary myoblasts and  
430 stable cell line. *In vivo*, when *Sh3kbp1* is depleted from mature myofibers in a period of time characterized by  
431 minimal myonuclei accretion in muscle fibers, we observe a tendency to slightly increase the percentage of  
432 myonuclei per myofibers in both WT and KI-*Dnm2*<sup>R465W</sup> conditions (Fig. S3E). These data suggest that SH3KBP1  
433 could contribute to fusion efficiency by a still unknown mechanism. The role of ER on myoblast fusion is poorly  
434 documented and its effect seems to be more indirectly linked to pathways related to physiologic ER stress  
435 signaling and SARC (stress-activated response to Ca<sup>2+</sup>) body formation more than a direct impact on myoblast  
436 fusion (Bohnert *et al*, 2017; Nakanishi *et al*, 2007; 2015). Alternatively, our *in vitro* data suggest that the global  
437 microtubule network organization is not changed but that dynamics of organelles related to microtubules  
438 pathways are improved, reflected by the increase of myonuclei dynamics in the absence of SH3KBP1 (Fig. 2A-F).  
439 There is also no evidence of a clear specific role of microtubules network on the fusion potential, however, the  
440 modification of microtubule dynamics/orientation by different MAPs are known to alter fusion potential  
441 (Mogessie *et al*, 2015; Straube & Merdes, 2007; Cadot *et al*, 2012). Fusion processes require remodeling of both  
442 membranes and actin cytoskeleton polymerization at the site where two membrane will fuse (Sampath *et al*,  
443 2018). One can hypothesize that SH3KBP1 could contribute to the fusion process through the control of  
444 membrane remodeling on specific PM-ER sites. Incidentally, we noticed that in absence of SH3KBP1, myotubes  
445 are longer, increasing consequently the fusiform shape of cells (Fig. 1D). As fusion mainly occurs at the tips of  
446 myotubes (Cadot *et al*, 2015; 2012), this increase of myotubes polarization could contribute to accumulate  
447 proteins involved in fusion specifically at the tips of myotubes and consequently favor fusion capacity.

448  
449 Altogether these data are in agreement with an involvement of *Sh3kbp1* in muscle fibers formation and  
450 maintenance. In the present study, we show that the adaptor protein SH3KBP1, through its N-terminus part, is  
451 able to scaffold ER *via* an interaction with Calnexin. SH3KBP1 also governs myonuclei motion and spatial  
452 organization as well as myoblast fusion. Additionally, we observed that SH3KBP1 interacts with DNM2 and  
453 organizes T-tubule formation in skeletal muscle; moreover, its down-regulation contributes to an increase of the  
454 CNM-like phenotype in the most frequent mutation model (KI-*Dnm2*<sup>R465W</sup>) of autosomal dominant centronuclear  
455 myopathy. Altogether, our data suggest that SH3KBP1 increase observed in AD-CNM model could be an attempt

456 of compensatory mechanism in CNM- KI-*Dnm2*<sup>R465W</sup> model and could be used as a preventing factor in the  
457 development of CNM phenotype.

458

## 459 **Figures**

460 **Figure 1: Myonuclear positioning during primary myotubes formation is controlled by *sh3kbp1*.** (A)  
461 Scheme of sequential steps in order to obtain immature myotubes from primary myoblasts. siRNAs were  
462 transfected 24 hours before myoblasts fusion. (B-C) Representative immunofluorescence staining of myosin  
463 heavy chain (green) and myonuclei (red) in primary myotubes treated for scramble (B) or a pool of 2 individual  
464 siRNAs targeting *Sh3kbp1* mRNA (C) after 3 days of differentiation, white arrows indicate “tips-aggregated  
465 myonuclei”. Scale Bar: 150 $\mu$ m. (D-E) Myotubes lengths and Mean distances between each myonuclei and  
466 myotube’s centroid (DMcM) ranked by myonuclei content per myotubes were quantified after 3 days of  
467 differentiation in cells treated with a scramble or *Sh3kbp1* siRNAs. Data from three independent experiments  
468 were combined. Scramble siRNA cells (n=1010) and *Sh3kbp1* siRNA cells (n=1093), Unpaired t-test, \*\*\*p < 0.001.  
469 Center lines show the medians; box limits indicate the 25th and 75th percentiles as determined by R software;  
470 whiskers extend 1.5 times the interquartile range from the 25th and 75th percentiles, outliers are represented  
471 by dots. (F) Myonuclei Spreading Graph (MSG) represents statistical spatial distribution of myonuclei along  
472 myotubes in scramble and in *Sh3kbp1* siRNA-treated myotubes; white-line represents the mean value of the  
473 statistical frequency.

474

475 **Figure 2: Myonuclei localization and motion are affected in *sh3kbp1* depleted primaries myofibers and  
476 lead to myonuclei aggregation.** (A) Scheme of sequential steps in order to obtain mature myofibers from  
477 primary mice myoblasts. siRNAs or shRNA were transfected during precocious steps of myoblasts fusion. (B-F)  
478 Primary myoblasts were treated with scramble or *Sh3kbp1* shRNA tagged with GFP (Green) and co-transfected  
479 with RFP-lamin-chromobody® (red) and were induced to differentiate for 5 days into myofibers. (B-D)  
480 Quantification of myonuclei clustering by myotubes (B), myonuclei time in motion (C) and myonuclei speed (D)  
481 were quantified using SkyPad analysis (Cadot *et al*, 2014). Data from three independent experiments were  
482 combined. Unpaired t-test, \*\*\*p < 0.001, \*\*p < 0.01. (E) Representative immunofluorescence staining of RFP-  
483 lamin-chromobody® (red) and shRNA tagged with GFP (Green) in primary myotubes treated with scramble or  
484 *Sh3kbp1* shRNA after 5 days of differentiation into myofibers. Scale Bar: 150 $\mu$ m. (Asterisks represents myonuclei  
485 clustering) (F) Frames from a 16h time-lapse movie in two channels (shRNA in green and lamin-chromobody®  
486 in red) of primary myotubes. In the first frame (on the left), myofibers are selected in white, which corresponds  
487 to the region used to create the adjacent kymograph. Scale Bar: 30 $\mu$ m. (Asterisks 1-5 are examples of individual  
488 myonuclei tracking). (G) Four representative images of 10 days differentiated myofibers transfected with either  
489 scramble or *Sh3kbp1* shRNA tagged with GFP, shRNA (Green) myonuclei (red). Scale Bar: 10 $\mu$ m. (Asterisks are  
490 individual myonuclei) (H-I) Quantification of the mean distance between pairwise myonuclei (H) and mean  
491 myofibers width (I) in 10 days differentiated myofibers treated with scramble siRNA or shRNA, a pool of 2  
492 individual siRNAs or an individual shRNAs targeting *Sh3kbp1*. Data from three independent experiments were  
493 combined. Center lines show the medians; box limits indicate the 25th and 75th percentiles as determined by R

494 software; whiskers extend 1.5 times the interquartile range from the 25th and 75th percentiles, outliers are  
495 represented by dots. Unpaired t-test, \*\*\*p < 0.001, \*\*p < 0.01, \*p < 0.05.

496

497 **Figure 3: SH3KBP1 is induced during myotubes differentiation and controls myonuclei aggregation in**  
498 **C2C12 cells.** (A) Western blot analysis of SH3KBP1 protein expression in total protein extracts from  
499 proliferating (P) or differentiating C2C12 cells for up to 5 days. C2C12 differentiation is assessed by Myogenin  
500 expression and Tubulin is used as loading control. (B-C) qRT-PCR analysis of *Sh3kbp1* (B) and *Myogenin* (C) gene  
501 expression level relative to *CycloB*, *Gapdh*, *GusB*, *Rpl41* and *Tbp* gene in proliferating C2C12 cells (P) or  
502 differentiating C2C12 cells for up to 5 days. (D) Representative western blots analysis of SH3KBP1 protein down-  
503 regulation in stable cell line constitutively expressing shRNA construct targeting *Sh3kbp1*. Tubulin is used as  
504 loading control. (E) Representative immunofluorescence staining of myosin heavy chain (green) and myonuclei  
505 (red) in 3 or 6 days cultured C2C12 stable cell lines expressing scramble shRNA or shRNA targeting *Sh3kbp1*.  
506 Zooms 1 & 2 are magnifications of images in white dots rectangle in 6 days old myotubes. Scale bars, 150  $\mu$ m and  
507 15  $\mu$ m in zoom. (F) Quantification of the number of myonuclei by clusters in C2C12 cells stable cell line  
508 expressing scramble shRNA or shRNA targeting *Sh3kbp1* after 5 days of differentiation. Data from three  
509 independent experiments were combined. Unpaired t-test, \*\*\*p < 0.001, \*p < 0.05. Center lines show the  
510 medians; box limits indicate the 25th and 75th percentiles as determined by R software; whiskers extend 1.5  
511 times the interquartile range from the 25th and 75th percentiles, outliers are represented by dots.

512 **Figure 4: SH3KBP1 is localized near and inside myonuclei and controls ERP72 positives Endoplasmic**  
513 **reticulum through Calnexin interaction during *in vitro* muscle fibers differentiation.** (A-B) Representative  
514 immunofluorescent staining of SH3KBP1 (green), Actin (Red) and myonuclei (blue) in the course of myotube  
515 formation in C2C12 cells line in proliferation (P) or after 2 and 5 days of differentiation (A) or in the course of  
516 myofibers formation in primary myoblast cultures in proliferation (P) or after 3 and 10 days of differentiation  
517 (B). Scale bars, 10  $\mu$ m. (C-D) Representative Immunofluorescent staining of Golgi Marker (RCAS1, for receptor  
518 binding cancer antigen expressed on SiSo cells, red) (C) and Endoplasmic Reticulum (ERP72, for Endoplasmic  
519 reticulum resident protein 72, red) (D) and myonuclei (blue) in 6 days cultured C2C12 stable cell line expressing  
520 either scramble shRNA or shRNA targeting *Sh3kbp1* gene (GFP-shRNA). Scale bars, 100  $\mu$ m. (E) Scheme of  
521 SH3KBP1 constructs, labeled with GFP in the N-terminus part, used for immunoprecipitation assay in (F-G). FL:  
522 full length. (F) Representative western blot with indicated antibodies (right) in C2C12s expressing GFP-  
523 SH3KBP1 constructs (top). (G) Representative western blot with indicated antibodies (right) of GFP-SH3KBP1  
524 constructs immunoprecipitation using C2C12 expressing indicated constructs (top). Blots were repeated more  
525 than 3 times.

526

527 **Figure 5: SH3KBP1 is localized near myonuclei and at I-band/Z-line zone in muscle fibers *in vivo* and**  
528 **interact with DNM2.** (A-B) Representative images of *Tibialis Anterior* muscle transversals cross-section stained  
529 for SH3KBP1 (green) and myonuclei (red). Asterisks show myonuclei inside myofibers. Scale bars, 150  $\mu$ m. (C-E)  
530 Representative images of *Tibialis Anterior* muscle longitudinal cross-section stained for SH3KBP1 (red) and  
531 DHPR1 $\alpha$ , for DyHydroPyridine Receptor alpha (green). Scale bars, 150  $\mu$ m. (F) Representative  
532 immunofluorescent staining of long term expression of SH3KBP1 constructs (listed in Fig. 4E) in green (GFP-  
533 constructs), Actin (red) and myonuclei (blue) in 10 days differentiated primary myofibers. Scale bars, 10  $\mu$ m. (G)

534 Line scan of the yellow boxes to visualize transversal organization of SH3KBP1 (green) and actin (red) staining.  
535 (H) Western blot with indicated antibodies (right) in C2C12 cells expressing Flag-SH3KBP1 constructs (top) and  
536 GFP-DNM2. (I) Representative western blot with indicated antibodies (right) of DNM2-GFP constructs  
537 immunoprecipitation using C2C12 expressing indicated constructs (top).

538

539 **Figure 6: SH3KBP1 controls T-tubule organization during muscle fibers formation and in mature**  
540 **myofibers.** (A-B) Representative immunofluorescent image of DHPR1- $\alpha$  (green), Actin (red) and myonuclei  
541 (blue) staining in 10 days cultured primary myotubes after scramble siRNA (A) or *Sh3kbp1* siRNA (B)  
542 transfection. Scale bars, 20  $\mu$ m. (C) Quantification of DHPR- $\alpha$  staining aspects in mature myofibers treated with  
543 either scramble siRNA, a pool of 2 individual siRNAs targeting *Sh3kbp1* mRNA, scramble shRNA or an individual  
544 shRNA targeting *Sh3kbp1* mRNA. Data from three independent experiments were combined. Unpaired t-test,  
545 \*\*\*p < 0.001, \*\*p < 0.01. Details for different categories are available in Fig. S2E. (D-E) Representative images of  
546 transversals (left) cross-section of *Tibialis Anterior* muscle electroporated with scramble or an individual  
547 shRNAs targeting *Sh3kbp1* and stained for GFP (green) and myonuclei (blue). Scale bars, 50  $\mu$ m (F)  
548 Quantification of muscle fibers electroporated with scramble or an individual shRNAs targeting *Sh3kbp1*. Center  
549 lines show the medians; box limits indicate the 25th and 75th percentiles as determined by R software; whiskers  
550 extend 1.5 times the interquartile range from the 25th and 75th percentiles, outliers are represented by dots.  
551 Unpaired t-test, \*\*\*p < 0.001. (G-H) Representative images of longitudinal cross-section of *Tibialis Anterior*  
552 muscle electroporated with scramble or an individual shRNAs targeting *Sh3kbp1* and stained for GFP and DHPR-  
553  $\alpha$ . Scale bars, 20  $\mu$ m.

554

555 **Figure 7: *sh3kbp1* silencing worsened CNM phenotype in KI-DNM2<sup>R465W</sup> mice model.** (A) qRT-PCR analysis  
556 of *Sh3kbp1* gene expression relative to *Nat10* gene *Tibialis Anterior* muscles from WT or KI-*Dnm2*<sup>R465W</sup> mice at 1,  
557 2, 4 and 8 months of age. Non-parametric one-way Anova used for statistical significance \*\*\*p < 0.001, \*\*p < 0.01, \*p  
558 < 0.05. (B-C) Representative images of *Tibialis Anterior* muscle cross-section from WT or KI- *Dnm2*<sup>R465W</sup> mice at  
559 the age of 4 months, injected with either PBS or AAV cognate vector expressing shRNA targeting *SH3KBP1* mRNA  
560 (Sh3kbp1-shRNA) for 3 months and stained for Dapi (Blue), Laminin (green) and MyHC (red). Scale Bars = 150  
561  $\mu$ m. (D-H) Quantification of Absolute force (P0) (D), *Tibialis Anterior* muscle mass (E), mean cross-sectioned  
562 myofibers areas (F), percentage of slow fibers (MHC1 positives) (G) and percentage of LC3II-positive fibers (H)  
563 of *Tibialis Anterior* muscles from WT or KI- *Dnm2*<sup>R465W</sup> mice at the age of 4 months, injected with either PBS or  
564 AAV cognate vector expressing shRNA targeting *SH3KBP1* mRNA (Sh3kbp1-shRNA) for 3 months. Data from at  
565 least 4 mice in each condition were combined. Unpaired t-test, \*\*\*p < 0.001, \*\*p < 0.01, \*p < 0.05. Center lines  
566 show the medians; box limits indicate the 25th and 75th percentiles as determined by R software; whiskers  
567 extend 1.5 times the interquartile range from the 25th and 75th percentiles, outliers are represented by dots.

568

569 **Supplementary figure 1: SH3KBP1 affects myoblast fusion.** (A) Representative western blot analysis of  
570 SH3KBP1 protein expression in total protein extracts from differentiating primary myotubes treated with  
571 scramble or siRNA (#1 & #2) or a pool of siRNA targeting *SH3KBP1* mRNA. Loading control is tubulin. (B-C)  
572 Representative immunofluorescent images of 3 days of primary differentiated myotubes stained for myosin  
573 heavy chain (green) and myonuclei (red) and treated with scramble (B) or with a pool of 2 individual *Sh3kbp1*



574 siRNAs. Scale Bar: 50 $\mu$ m. (D-G) Quantification of differentiation index (percentage of nuclei in Myosin Heavy  
575 Chain positives cells) (D), Fusion index (percentage of nuclei inside myotubes) (E), Average number of nuclei by  
576 myotubes (F) and distribution of myotubes classified depending on the number of nuclei in myotubes (G). Data  
577 from three independent experiments were combined. Unpaired t-test, \*\*p < 0.01, \*p < 0.05. Center lines show  
578 the medians; box limits indicate the 25th and 75th percentiles as determined by R software; whiskers extend 1.5  
579 times the interquartile range from the 25th and 75th percentiles, outliers are represented by dots.

580

581 **Supplementary figure 2: SH3KBP1 affects myoblast fusion and localization of myonuclei in C2C12 cells.**

582 (A-B) Distribution of 3 days differentiated C2C12 myotubes formed from stable cell line expressing either  
583 scramble or *Sh3kbp1* shRNAs and classified depending on nuclei content inside myotubes after (A) 3 days or (B)  
584 5 days of differentiation. (C) Representatives immunofluorescent staining of myosin heavy chain (green) and  
585 myonuclei (red) in stable cell line expressing *Sh3kbp1* shRNA (top) or co-transfected with full-length SH3KBP1  
586 (bottom) after 5 days of differentiation. Scale Bar: 50 $\mu$ m. (D) Quantification of the percentage of nuclei by  
587 clusters in stable cell line expressing *Sh3kbp1* shRNA and co-transfected with mCherry or full-length SH3KBP1  
588 plasmid. Data from three independent experiments were combined. Unpaired t-test, \*\*\*p < 0.001, \*\*p < 0.01, \*p  
589 < 0.05. Center lines show the medians; box limits indicate the 25th and 75th percentiles as determined by R  
590 software; whiskers extend 1.5 times the interquartile range from the 25th and 75th percentiles, outliers are  
591 represented by dots. (E) Representatives immunofluorescent categories of staining for DHPR-alpha in 10 days  
592 differentiated myofibers. Scale Bar: 2 $\mu$ m.

593

594 **Supplementary figure 3: *sh3kbp1* silencing worsened CNM phenotype in KI-DNM2<sup>R465W</sup> mice model.** (A)

595 qRT-PCR analysis of *Sh3kbp1* gene expression relative to Nat10 gene in 4 months *Tibialis Anterior* muscles from  
596 WT or KI- *Dnm2*<sup>R465W</sup> mice injected with either PBS or AAV cognate vector expressing shRNA targeting *SH3KBP1*  
597 mRNA (*Sh3kbp1*-shRNA). \*\*\*p < 0.001. (B-F) Quantification of total body mass (B), distribution of cross-  
598 sectioned myofibers areas (C), number of fibers by muscles (D), number of myonuclei by fiber (E) and number of  
599 internalized myonuclei (F) in *Tibialis Anterior* muscles from WT or KI-*Dnm2*<sup>R465W</sup> mice at the age of 4 months,  
600 injected with either PBS or AAV cognate vector expressing shRNA targeting *SH3KBP1* mRNA (AAV-SH3KBP1) for  
601 3 months. Data from at least 4 mice in each condition were combined. Unpaired t-test, \*\*\*p < 0.001, \*\*p < 0.01,  
602 \*p < 0.05. Center lines show the medians; box limits indicate the 25th and 75th percentiles as determined by R  
603 software; whiskers extend 1.5 times the interquartile range from the 25th and 75th percentiles, outliers are  
604 represented by dots. (G) Immunofluorescent staining of SH3KBP1, Actin and nuclei in two control human patient  
605 and in two patients expressing DNM2-R465W point mutation.

606

607 **Supplementary video 1 & 2:** Timelapse experiments of primary myoblasts co-transfected with Lamin-

608 Chromobody®-RFP plasmids and with either Scramble-siRNA (Supplementary video-1) or *Sh3kbp1*-siRNA  
609 (Supplementary video-2) and induce to form myotubes during 5 days after starting differentiation process.  
610 Primary myotubes were recorded every 20 minutes for a period of time of 16 hours.

611

612 **Materials and methods**



613

## 614 **Cell culture**

615 Primary myoblasts were collected from wild type C57BL6 mice as described before (Falcone *et al*, 2014; Pimentel *et*  
616 *al*, 2017). Briefly, Hindlimb muscles from 6 days pups were extracted and digested with collagenase (Sigma, C9263-  
617 1G) and dispase (Roche, 04942078001). After a pre-plating step to discard contaminant cells such as fibroblasts,  
618 myoblasts were cultured on matrigel coated-dish (Corning, 356231) and induced to differentiate in myotubes for 2-3  
619 days in differentiation media (DM: IMDM (Gibco, 21980-032) + 2% of horse serum (Gibco, 16050-122) + 1%  
620 penicillin-streptomycin (Gibco, 15140-122)). Myotubes were then covered by a concentrated layer of matrigel and  
621 maintained for up to 10 days in long differentiation culture medium (LDM: IMDM (Gibco, 21980-032) + 2% of horse  
622 serum (Gibco, 16050-122) + 0.1% Agrin + 1% penicillin-streptomycin (Gibco, 15140-122)) until the formation of  
623 mature and contracting myofibers. LDM was changed every two days.

624 Mouse myoblast C2C12 cells were cultured in Dulbecco's modified Eagle's medium (DMEM (Gibco, 41966029) +  
625 15% fetal bovine serum (FBS) (Gibco, 10270-106) + 1% penicillin-streptomycin (Gibco, 15140-122))) and were plated  
626 on 0.1% matrigel-coated dishes for 1-2 days before differentiation. Differentiation was induced by switching to  
627 differentiation media (DMEM + 1% horse serum).

## 628 **Cell transfection**

629 For C2C12 cells, 3 different siRNAs Silencer per gene were transfected using Lipofectamine 2000 (ThermoFisher  
630 Scientifics, 11668-019) at the final concentration of 10 nM, following manufacturer instructions, 2 days before  
631 differentiation. For shRNA cDNA (Geneocopia) transfection, Lipofectamine 2000 (ThermoFisher Scientifics, 11668-  
632 019) was used following manufacturer instructions.

633 For primary cells, siRNA were transfected using Lipofectamine 2000 (ThermoFisher Scientifics, 11668-019) at the final  
634 concentration of 2 nM. shRNA (Geneocopia), Eb1 or RFP-Lamin-chromobody (Chromotek) cDNA were transfected  
635 using Lipofectamine 3000 (ThermoFisher Scientifics, L3000-008). For the list of siRNA, shRNA and DNA constructs,  
636 refer to supplementary table 1.

637

## 638 **Protein sample preparation**

639 For primary cultured cells or C2C12 cell lines, cells were harvested, using Trypsin for 5min at 37°C and centrifuged at  
640 1500RPM for 5min at 4°C. Cell pellets were diluted and incubated in the optimal volume of RIPA lysis buffer  
641 containing phosphatases inhibitors (Sigma, P5726-5mL) and proteases inhibitors (Sigma, P8340) for 10min at 4°C.  
642 Following a sonication and a centrifugation at 12000RPM for 10min at 4°C, protein samples were collected for further  
643 uses. The concentration of proteins was determined using BCA protein assay kit (Thermo Fisher Scientifics, 23225) as  
644 described by the manufacturer.

645

## 646 **Western blot**

647 To carry out western blots, the same amount of sample were loaded in 6% acrylamide gels and were migrated at 130V  
648 for 10min followed by 160V for 90min. iBlot 2 mini slacks (Thermo Fisher Scientifics, IB23002) semi-dry system was  
649 used to transfer the proteins to nitrocellulose membranes. Membranes were then saturated in 5% milk in TBS for 1h at

650 room temperature (RT) and were incubated in primary antibodies in 5% milk in TBS over night at 4°C. Following  
651 washes by 0.1% Tween-20-1X TBS, the membranes were incubated in HRP conjugated secondary antibodies in 5%  
652 milk in TBST for 1h at room temperature (RT). Following washes by 0.1% Tween-20-1X TBS the detection of the  
653 target proteins was carried out using Super Signal West Femto (Thermo Fisher Scientifics, 34095) and ChemiDoc  
654 imaging system (BioRad).

655

## 656 **Antibodies**

657 Cells were fixed in 4%PFA in PBS for 20min at 37°C followed by washes with PBS and permeabilization with 0.5%  
658 Triton-X100 in PBS for 5min at RT. Following washes with PBS, cells were saturated with 1% BSA in PBS for 30min  
659 at 37°C and incubated in primary antibodies over night at 4°C. Following washes with 0.05% Triton-X100 in PBS, cells  
660 were incubated in secondary antibodies or dyes for 2hrs at RT followed by washes with 0.05% Triton-X100 in PBS and  
661 a last wash in PBS. Cultured myofibers were imaged using either Z1-AxioObserver (Zeiss) or confocal SP5 microscope  
662 (Leica). For the list of antibodies and dilution, refer to supplementary table 2.

663

## 664 **Video-Microscopy**

665 Time-lapse images were acquired using Z1-AxioObserver (Zeiss) with intervals of 20 minutes. Final videos were  
666 analyzed using Metamorph (Zeiss) and SkyPad plugin as described before (Cadot *et al*, 2014).

667

## 668 **Adeno-Associated Virus production and *in vivo* transduction**

669 A cassette containing the small hairpin (sh) RNA under the control of H1 RNA polymerase III promoter was inserted in  
670 a pSMD2 expression plasmid. AAV vectors (serotype 1) were produced in HEK293 cells after transfection of the  
671 pSMD2-shRNA plasmid, the pXX6 plasmid coding for viral helper genes essential for AAV production and the  
672 pRepCap plasmid (p0001) coding for AAV1 capsid as described previously (Riviere *et al*, 2006). Viral particles were  
673 purified on iodixanol gradients and concentrated on Amicon Ultra-15 100K columns (Merck-Millipore). The  
674 concentration of viral genomes (vg/ml) was determined by quantitative real-time PCR on a LightCycler480 (Roche  
675 diagnostic, France) by using TaqMan probe. A control pSMD2 plasmid was tenfold serially diluted (from  $10^7$  to  $10^1$   
676 copies) and used as a control to establish the standard curve for absolute quantification. Male wild type and  
677 heterozygous KI-*Dnm2*<sup>R465W</sup> mice were injected under isoflurane anesthesia. Two intramuscular injections of 30  $\mu$ l  
678 within 24h interval were performed using 29G needle in TA muscles corresponding to  $10^{11}$  viral genomes per muscle.  
679 All of the experiments and procedures were conducted in accordance with the guidelines of the local animal ethics  
680 committee of the University Claude Bernard – Lyon 1 and in accordance with French and European legislation on  
681 animal experimentation and approved by the ethics committee CECCAPP and the French ministry of research.

682

## 683 **Muscle contractile properties**

684 The isometric contractile properties of TA muscles were studied *in situ* on mice anesthetized with 60 mg/kg  
685 pentobarbital. The distal tendon of the TA muscle was attached to a lever arm of a servomotor system (305B Dual-

686 Mode Lever, Aurora Scientific). The sciatic nerve was stimulated by a bipolar silver electrode using a supramaximal  
687 (10 V) square wave pulse of 0.1 ms duration. Absolute maximal isometric tetanic force was measured during isometric  
688 contractions in response to electrical stimulation (frequency of 25–150 Hz; train of stimulation of 500 ms). All  
689 isometric contraction measurements were made at optimal muscle length. Force are expressed in grams (1 gram = 9.8  
690 mNewton). Mice were sacrificed by cervical dislocation and TA muscles were weighted. Specific maximal force was  
691 calculated by dividing absolute force by muscle weight.

## 692 **RNA extraction**

693 After the addition of Trizol (Sigma, T9424-200mL) on each sample, lysing matrix D and fast prep system (MPbio,  
694 6913-100) were used for sample digestion and pre-RNA extraction. In order to extract RNA, samples were incubated in  
695 chloroform for 5min at RT, centrifuged for 15min at 12000 rcf at 4°C and incubated in the tubes containing isopropanol  
696 (precipitation of RNA) for 10min at RT. following a centrifuge of samples for 15min at 12000rcf at 4°C, samples  
697 were washed 2 times with 70% ethanol and the final RNA pellets were diluted in ultra-pure RNase free water  
698 (Invitrogen, 10977-035). RNA concentration was calculated using Nanodrop (ThermoFisher Scientific).

## 699 **RT-q-PCR on cells**

700 Goscript Reverse Transcriptase System (Promega, A5001) was used, as described by the manufacturer to produce the  
701 cDNA. Fast Start Universal SYBR Green Master (Rox)(Roche, 04913914001) and CFX Connect™ Real-Time PCR  
702 Detection System (BioRad) were used to carry out the quantitative PCR using the following primer sets. The CT of  
703 target genes were normalized on 3 control genes. For the list of primers used, refer to supplementary table 1.

## 704 **RT-q-PCR on muscle samples**

705 50 longitudinal sections (12 μm) of TA muscles were cut and used for RNA isolation and RT-qPCR. Total RNA was  
706 extracted from muscle by using NucleoSpin (Macherey-Nagel). RNA (200 ng) was reverse transcribed using Reverse  
707 Transcription Core Kit (Eurogentec). Real-time PCR was performed in a 20 μL final volume using the Takyon No Rox  
708 SYBR kit (Eurogentec). Fluorescence intensity was recorded using a CFX96 Real-Time PCR Detection System (Bio-  
709 Rad) and the data analyzed using the  $\Delta\Delta C_t$  method of analysis. Reference gene 18s was used to normalize the  
710 expression level of the gene of interest as previously described (Pfaffl et al., 2001). The selected forward and reverse  
711 primer sequences are listed in Table 1. Statistical analyses were performed using GraphPad PRISM 5.0 (La Jolla). Data  
712 were analyzed for normal distribution using Shapiro-Wilk test. Non-parametric one-way Anova (n = 4-6) was used to  
713 determine transcripts expression level. Primers were designed using Primer 3 software from gene sequences obtained  
714 from Genebank. Primer specificity was determined using a BLAST search. For the list of primers used, refer to  
715 supplementary table 1.

716

## 717 **Histological staining and analysis**

718 *Tibialis anterior* muscles were collected, embedded in tragacanth gum, and quickly frozen in isopentane cooled in  
719 liquid nitrogen. Cross-sections (10μm thick) were obtained from the middle portion of frozen muscles and processed for

720 histological, immunohistochemical, enzymohistochemical analyses according to standard protocols. The fibre cross-  
721 sectional area and the number of centrally nucleated fibers were determined using Laminin and Dapi-stained sections.  
722 Fluorescence microscopy and transmission microscopy were performed using Axioimager Z1 microscope with CP  
723 Achromat 5x/0.12, 10x/0.3 Ph1, or 20x/0.5 Plan NeoFluar objectives (Zeiss). Images were captured using a charge-  
724 coupled device monochrome camera (Coolsnap HQ, Photometrics) or color camera (Coolsnap colour) and MetaMorph  
725 software. For all imaging, exposure settings were identical between compared samples. Fiber number and size, central  
726 nuclei and peripheral myonuclei were calculated using ImageJ software.

## 727 **Quantification methods for myonuclei spreading in myotubes**

728 Quantifications in immature myotubes were assessed using an homemade analysis tool. An image analysis performed in  
729 ImageJ® software is combined with a statistical analysis in RStudio® software. This provides quantifications of  
730 parameters, ranked by myonuclei content per myotubes, regarding phenotype of myotubes (area, length) and their  
731 respective myonuclei positioning compare to centroid of myotubes (DMcM).  
732 MSG diagrams were obtained through the normalization of lengths of all analyzed myotubes (independently to their  
733 myonuclei content) to 100%. White lines represent myonuclei density curves assessing the statistical frequency for  
734 myonuclei positioning along myotubes. Each color group reflects statistical estimation of myonuclei clustering along  
735 myotubes.

736

## 737 **Additional information**

738

### 739 **Competing interests**

740 The authors declare no competing interests.

### 741 **Funding**

742 This work was funded by grants from ATIP-AVENIR Program and Association Française contre les Myopathies  
743 (MyoNeurAlp Alliance).

744

### 745 **Acknowledgements**

746 We thank the Penn Vector Core, Gene Therapy Program (University of Pennsylvania, Philadelphia, US) for providing  
747 pAAV1 plasmid (p0001), and Sofia Benkhelifa-Ziyyat for AAV production, the Imaging facilities of Lyon, PLATIM  
748 and CICLE, the animal facility of Lyon, PBES, and particularly, Christophe Chamot and Claire Burny for building the  
749 macros in ImageJ and R-Studio.

750

### 751 **Author contributions**

752 Conceptualization, A.G., M.B. and V.G. ; Methodology, A.G., N.C., M.B., A.G., A-C.D. and V.G. Formal Analysis,  
753 A.G., M.B., A.G., A-C.D., D.A., E.C. and V.G. Investigation, G., E.C., M.B., N.C., C.K-R, A.J., A.G., A-C.D, D.A., N-  
754 B. R., M-T. B., L.J., M.B. and V.G. Writing – Original Draft, V.G., V.B., and M.B. Funding Acquisition V.G.

755

## 756 **References**

- 757 Al-Qusairi L & Laporte J (2011) T-tubule biogenesis and triad formation in skeletal muscle and implication in  
758 human diseases. *Skelet Muscle* **1**: 26
- 759 Al-Qusairi L, Weiss N, Toussaint A, Berbey C, Messaddeq N, Kretz C, Sanoudou D, Beggs AH, Allard B, Mandel J-L,  
760 Laporte J, Jacquemond V & Buj-Bello A (2009) T-tubule disorganization and defective excitation-contraction  
761 coupling in muscle fibers lacking myotubularin lipid phosphatase. *Proc. Natl. Acad. Sci. U.S.A.* **106**: 18763–  
762 18768
- 763 Barone V, Randazzo D, Re V, Sorrentino V & Rossi D (2015) Organization of junctional sarcoplasmic reticulum  
764 proteins in skeletal muscle fibers. *Journal of muscle research and cell motility* **36**: 501–515
- 765 Bevilacqua JA, Monnier N, Bitoun M, Eymard B, Ferreiro A, Monges S, Lubieniecki F, Taratuto AL, Laquerrière A,  
766 Claeys KG, Marty I, Fardeau M, Guicheney P, Lunardi J & Romero NB (2011) Recessive RYR1 mutations cause  
767 unusual congenital myopathy with prominent nuclear internalization and large areas of myofibrillar  
768 disorganization. *Neuropathol. Appl. Neurobiol.* **37**: 271–284
- 769 Bitoun M, Maugendre S, Jeannet P-Y, Lacène E, Ferrer X, Laforêt P, Martin J-J, Laporte J, Lochmüller H, Beggs AH,  
770 Fardeau M, Eymard B, Romero NB & Guicheney P (2005) Mutations in dynamin 2 cause dominant  
771 centronuclear myopathy. *Nature genetics* **37**: 1207–1209
- 772 Blondelle J, Ohno Y, Gache V, Guyot S, Storck S, Blanchard-Gutton N, Barthélémy I, Walmsley G, Rahier A, Gadin S,  
773 Maurer M, Guillaud L, Prola A, Ferry A, Aubin-Houzelstein G, Demarquoy J, Relaix F, Piercy RJ, Blot S, Kihara  
774 A, et al (2015) HACD1, a regulator of membrane composition and fluidity, promotes myoblast fusion and  
775 skeletal muscle growth. *J Mol Cell Biol* **7**: 429–440
- 776 Bohnert KR, McMillan JD & Kumar A (2017) Emerging roles of ER stress and unfolded protein response  
777 pathways in skeletal muscle health and disease. *J. Cell. Physiol* **233**: 67–78
- 778 Bruusgaard JC, Liestøl K & Gundersen K (2006) Distribution of myonuclei and microtubules in live muscle fibers  
779 of young, middle-aged, and old mice. *Journal of Applied Physiology* **100**: 2024–2030
- 780 Bruusgaard JC, Liestøl K, Ekmark M, Kollstad K & Gundersen K (2003) Number and spatial distribution of nuclei  
781 in the muscle fibres of normal mice studied in vivo. *The Journal of Physiology* **551**: 467–478
- 782 Buchman VL, Luke C, Borthwick EB, Gout I & Ninkina N (2002) Organization of the mouse Ruk locus and  
783 expression of isoforms in mouse tissues. *Gene* **295**: 13–17
- 784 Burgoyne T, Morris EP & Luther PK (2015) Three-Dimensional Structure of Vertebrate Muscle Z-Band: The  
785 Small-Square Lattice Z-Band in Rat Cardiac Muscle. *Journal of molecular biology* **427**: 3527–3537
- 786 Cadot B, Gache V & Gomes ER (2014) Fast, multi-dimensional and simultaneous kymograph-like particle  
787 dynamics (SkyPad) analysis. *PLoS ONE* **9**: e89073
- 788 Cadot B, Gache V & Gomes ER (2015) Moving and positioning the nucleus in skeletal muscle - one step at a time.  
789 *Nucleus* **6**: 373–381
- 790 Cadot B, Gache V, Vasyutina E, Falcone S, Birchmeier C & Gomes ER (2012) Nuclear movement during myotube  
791 formation is microtubule and dynein dependent and is regulated by Cdc42, Par6 and Par3. *EMBO Rep.* **13**:  
792 741–749
- 793 Chin Y-H, Lee A, Kan H-W, Laiman J, Chuang M-C, Hsieh S-T & Liu Y-W (2015) Dynamin-2 mutations associated  
794 with centronuclear myopathy are hypermorphic and lead to T-tubule fragmentation. *Hum. Mol. Genet.* **24**:  
795 5542–5554
- 796 Doñate Puertas R, Millat G, Ernens I, Gache V, Chauveau S, Morel E, Christin E, Couturier N, Devaux Y & Chevalier  
797 P (2018) Atrial Structural Remodeling Gene Variants in Patients with Atrial Fibrillation. *Biomed Res Int*  
798 **2018**: 4862480–12
- 799 Durieux A-C, Vignaud A, Prudhon B, Viou MT, Beuvin M, Vassilopoulos S, Fraysse B, Ferry A, Lainé J, Romero NB,

- 800 Guicheney P & Bitoun M (2010) A centronuclear myopathy-dynamin 2 mutation impairs skeletal muscle  
801 structure and function in mice. *Hum. Mol. Genet.* **19**: 4820–4836
- 802 Falcone S, Roman W, Hnia K, Gache V, Didier N, Laine J, Aurade F, Marty I, Nishino I, Charlet-Berguerand N,  
803 Romero NB, Marazzi G, Sassoon D, Laporte J & Gomes ER (2014) N-WASP is required for Amphiphysin-  
804 2/BIN1-dependent nuclear positioning and triad organization in skeletal muscle and is involved in the  
805 pathophysiology of centronuclear myopathy. *EMBO Mol Med* **6**: 1455–1475
- 806 Fongy A, Falcone S, Lainé J, Prudhon B, Martins-Bach A & Bitoun M (2019) Nuclear defects in skeletal muscle  
807 from a Dynamin 2-linked centronuclear myopathy mouse model. *Scientific Reports* **9**: 1580
- 808 Fujita N, Huang W, Lin T-H, Groulx J-F, Jean S, Nguyen J, Kuchitsu Y, Koyama-Honda I, Mizushima N, Fukuda M &  
809 Kiger AA (2017) Genetic screen in *Drosophila* muscle identifies autophagy-mediated T-tubule remodeling  
810 and a Rab2 role in autophagy. *Elife* **6**: e23367
- 811 Gache V, Gomes ER & Cadot B (2017) Microtubule motors involved in nuclear movement during skeletal muscle  
812 differentiation. *Mol. Biol. Cell*: mbc.E16–06–0405
- 813 Ghasemizadeh A, Christin E, Guiraud A, Couturier N, Risson V, Girard E, Jagla C, Soler C, Laddada L, Sanchez C,  
814 Jaque F, Garcia A, Lanfranchi M, Jacquemond V, Gondin J, Courchet J, Schaeffer L & Gache V (2019) Skeletal  
815 muscle MACF1 maintains myonuclei and mitochondria localization through microtubules to control muscle  
816 functionalities. *bioRxiv* **12**: 636464
- 817 Gimpel P, Lee YL, Sobota RM, Calvi A, Koullourou V, Patel R, Mamchaoui K, Nedelec F, Shackleton S, Schmoranzer  
818 J, Burke B, Cadot B & Gomes ER (2017) Nesprin-1 $\alpha$ -Dependent Microtubule Nucleation from the Nuclear  
819 Envelope via Akap450 Is Necessary for Nuclear Positioning in Muscle Cells. *Current biology: CB*
- 820 Grumati P, Dikic I & Stolz A (2018) ER-phagy at a glance. *J. Cell. Sci.* **131**: jcs217364
- 821 Gundersen K (2016) Muscle memory and a new cellular model for muscle atrophy and hypertrophy. *Journal of*  
822 *Experimental Biology* **219**: 235–242
- 823 Havrylov S, Ichioka F, Powell K, Borthwick EB, Baranska J, Maki M & Buchman VL (2008) Adaptor protein  
824 Ruk/CIN85 is associated with a subset of COPI-coated membranes of the Golgi complex. *Traffic* **9**: 798–812
- 825 Havrylov S, Jolanta Redowicz M & Buchman VL (2010) Emerging Roles of Ruk/CIN85 in Vesicle-Mediated  
826 Transport, Adhesion, Migration and Malignancy. *Traffic* **11**: 721–731
- 827 Havrylov S, Rzhpetskyy Y, Malinowska A, Drobot L & Redowicz MJ (2009) Proteins recruited by SH3 domains of  
828 Ruk/CIN85 adaptor identified by LC-MS/MS. *Proteome Sci* **7**: 21
- 829 Janin A & Gache V (2018) Nesprins and Lamins in Health and Diseases of Cardiac and Skeletal Muscles. *Front*  
830 *Physiol* **9**: 97
- 831 Jungbluth H & Gautel M (2014) Pathogenic mechanisms in centronuclear myopathies. *Front Aging Neurosci* **6**:  
832 339
- 833 Jungbluth H, Zhou H, Sewry CA, Robb S, Treves S, Bitoun M, Guicheney P, Buj-Bello A, Bönnemann C & Muntoni F  
834 (2007) Centronuclear myopathy due to a de novo dominant mutation in the skeletal muscle ryanodine  
835 receptor (RYR1) gene. *Neuromuscular Disorders* **17**: 338–345
- 836 Kim JH, Jin P, Duan R & Chen EH (2015) Mechanisms of myoblast fusion during muscle development. *Curr. Opin.*  
837 *Genet. Dev.* **32**: 162–170
- 838 Kimura K, Mamane A, Sasaki T, Sato K, Takagi J, Niwayama R, Hufnagel L, Shimamoto Y, Joanny J-F, Uchida S &  
839 Kimura A (2017) Endoplasmic-reticulum-mediated microtubule alignment governs cytoplasmic streaming.  
840 *Nat. Cell Biol.* **19**: 399–406
- 841 Laporte J, Hu LJ, Kretz C, Mandel JL, Kioschis P, Coy JF, Klauck SM, Poustka A & Dahl N (1996) A gene mutated in



- 842 X-linked myotubular myopathy defines a new putative tyrosine phosphatase family conserved in yeast.  
843 *Nature genetics* **13**: 175–182
- 844 Liu J-X, Höglund A-S, Karlsson P, Lindblad J, Qaisar R, Aare S, Bengtsson E & Larsson L (2009) Myonuclear  
845 domain size and myosin isoform expression in muscle fibres from mammals representing a 100,000-fold  
846 difference in body size. *Experimental physiology* **94**: 117–129
- 847 Louis M, Zanou N, Van Schoor M & Gailly P (2008) TRPC1 regulates skeletal myoblast migration and  
848 differentiation. *J. Cell. Sci.* **121**: 3951–3959
- 849 Metzger T, Gache V, Xu M, Cadot B, Folker ES, Richardson BE, Gomes ER & Baylies MK (2012) MAP and kinesin-  
850 dependent nuclear positioning is required for skeletal muscle function. *Nature* **484**: 120–124
- 851 Mogessie B, Roth D, Rahil Z & Straube A (2015) A novel isoform of MAP4 organises the paraxial microtubule  
852 array required for muscle cell differentiation. *Elife* **4**: e05697
- 853 Nakanishi K, Dohmae N & Morishima N (2007) Endoplasmic reticulum stress increases myofiber formation in  
854 vitro. *The FASEB Journal* **21**: 2994–3003
- 855 Nakanishi K, Kakiguchi K, Yonemura S, Nakano A & Morishima N (2015) Transient Ca<sup>2+</sup>-depletion from the  
856 endoplasmic reticulum is critical for skeletal myoblast differentiation. *The FASEB Journal* **29**: 2137–2149
- 857 Nicot A-S, Toussaint A, Tosch V, Kretz C, Wallgren-Pettersson C, Iwarsson E, Kingston H, Garnier J-M, Biancalana  
858 V, Oldfors A, Mandel J-L & Laporte J (2007) Mutations in amphiphysin 2 (BIN1) disrupt interaction with  
859 dynamin 2 and cause autosomal recessive centronuclear myopathy. *Nature genetics* **39**: 1134–1139
- 860 Penga L, Rasmussen MI, Chailyana A, Houenb G & Højrupa P (2014) Probing the structure of human protein  
861 disulfide isomerase by chemical cross-linking combined with mass spectrometry. *J Proteomics* **108**: 1–16
- 862 Pimentel MR, Falcone S, Cadot B & Gomes ER (2017) In Vitro Differentiation of Mature Myofibers for Live  
863 Imaging. *Journal of visualized experiments: JoVE*: e55141–e55141
- 864 Pizon V, Gerbal F, Diaz CC & Karsenti E (2005) Microtubule-dependent transport and organization of sarcomeric  
865 myosin during skeletal muscle differentiation. *EMBO J.* **24**: 3781–3792
- 866 Qaisar R (2012) Myonuclear Organization and Regulation of Muscle Contraction in Single Muscle Fibres: Effects  
867 of Ageing, Gender, Species, Endocrine Factors and Muscle Size. : 1–64
- 868 Qaisar R & Larsson L (2014) What determines myonuclear domain size? *Indian J. Physiol. Pharmacol.* **58**: 1–12
- 869 Quon E, Sere YY, Chauhan N, Johansen J, Sullivan DP, Dittman JS, Rice WJ, Chan RB, Di Paolo G, Beh CT & Menon  
870 AK (2018) Endoplasmic reticulum-plasma membrane contact sites integrate sterol and phospholipid  
871 regulation. *PLoS Biol.* **16**: e2003864–41
- 872 Rabai A, Reisser L, Reina-San-Martin B, Mamchaoui K, Cowling BS, Nicot A-S & Laporte J (2019) Allele-Specific  
873 CRISPR/Cas9 Correction of a Heterozygous DNM2 Mutation Rescues Centronuclear Myopathy Cell  
874 Phenotypes. *Mol Ther Nucleic Acids* **16**: 246–256
- 875 Ralston E, Lu Z & Ploug T (1999) The organization of the Golgi complex and microtubules in skeletal muscle is  
876 fiber type-dependent. *J. Neurosci.* **19**: 10694–10705
- 877 Robson MI, Las Heras de JI, Czapiewski R, Lê Thành P, Booth DG, Kelly DA, Webb S, Kerr ARW & Schirmer EC  
878 (2016) Tissue-Specific Gene Repositioning by Muscle Nuclear Membrane Proteins Enhances Repression of  
879 Critical Developmental Genes during Myogenesis. *Mol. Cell* **62**: 834–847
- 880 Roman W, Martins JP, Carvalho FA, Voituriez R, Abella JVG, Santos NC, Cadot B, Way M & Gomes ER (2017)  
881 Myofibril contraction and crosslinking drive nuclear movement to the periphery of skeletal muscle. *Nat. Cell*  
882 *Biol.* **152**: 1376–33

- 883 Romero NB (2010) Centronuclear myopathies: a widening concept. *Neuromuscular disorders: NMD* **20**: 223–228
- 884 Romero NB & Bitoun M (2011) Centronuclear myopathies. *Semin Pediatr Neurol* **18**: 250–256
- 885 Romero NB & Laporte J (2013) Centronuclear Myopathies Oxford, UK: Wiley-Blackwell
- 886 Sampath SC, Sampath SC & Millay DP (2018) Myoblast fusion confusion: the resolution begins. : 1–10
- 887 Satoh M, Shimada A, Keino H, Kashiwai A, Nagai N, Saga S & Hosokawa M (2005) Functional characterization of 3  
888 thioredoxin homology domains of ERp72. *Cell Stress Chaperones* **10**: 278–284
- 889 Schroeder B, Weller SG, Chen J, Billadeau D & McNiven MA (2010) A Dyn2-CIN85 complex mediates degradative  
890 traffic of the EGFR by regulation of late endosomal budding. *EMBO J.* **29**: 3039–3053
- 891 Schulze RJ, Weller SG, Schroeder B, Krueger EW, Chi S, Casey CA & McNiven MA (2013) Lipid droplet breakdown  
892 requires dynamin 2 for vesiculation of autolysosomal tubules in hepatocytes. *J. Cell Biol.* **203**: 315–326
- 893 Straube A & Merdes A (2007) EB3 regulates microtubule dynamics at the cell cortex and is required for myoblast  
894 elongation and fusion. *Current biology: CB* **17**: 1318–1325
- 895 Sun Y, Leong NT, Wong T & Drubin DG (2015) A Pan1/End3/Sla1 complex links Arp2/3-mediated actin assembly  
896 to sites of clathrin-mediated endocytosis. *Mol. Biol. Cell* **26**: 3841–3856
- 897 Tanabe K & Takei K (2009) Dynamic instability of microtubules requires dynamin 2 and is impaired in a Charcot-  
898 Marie-Tooth mutant. *J. Cell Biol.* **185**: 939–948
- 899 Tassin AM, Paintrand M, Berger EG & Bornens M (1985) The Golgi apparatus remains associated with  
900 microtubule organizing centers during myogenesis. *J. Cell Biol.* **101**: 630–638
- 901 Thompson HM, Cao H, Chen J, Euteneuer U & McNiven MA (2004) Dynamin 2 binds gamma-tubulin and  
902 participates in centrosome cohesion. *Nat. Cell Biol.* **6**: 335–342
- 903 Wada I, Rindress D, Cameron PH, Ou WJ, Doherty JJ, Louvard D, Bell AW, Dignard D, Thomas DY & Bergeron JJ  
904 (1991) SSR alpha and associated calnexin are major calcium binding proteins of the endoplasmic reticulum  
905 membrane. *J. Biol. Chem.* **266**: 19599–19610
- 906 Wang S, Reuveny A & Volk T (2015) Nesprin provides elastic properties to muscle nuclei by cooperating with  
907 spectraplakins and EB1. *J. Cell Biol.* **209**: 529–538
- 908 Wang Z, Cui J, Wong WM, Li X, Xue W, Lin R, Wang J, Wang P, Tanner JA, Cheah KSE, Wu W & Huang J-D (2013)  
909 Kif5b controls the localization of myofibril components for their assembly and linkage to the myotendinous  
910 junctions. *Development* **140**: 617–626
- 911 Wilmshurst JM, Lillis S, Zhou H, Pillay K, Henderson H, Kress W, Müller CR, Ndondo A, Cloke V, Cullup T, Bertini E,  
912 Boennemann C, Straub V, Quinlivan R, Dowling JJ, Al-Sarraj S, Treves S, Abbs S, Manzur AY, Sewry CA, et al  
913 (2010) RYR1 mutations are a common cause of congenital myopathies with central nuclei. *Annals of*  
914 *neurology* **68**: 717–726
- 915 Wilson MH & Holzbaur ELF (2014a) Nesprins anchor kinesin-1 motors to the nucleus to drive nuclear  
916 distribution in muscle cells. *Development* **142**: 218–228
- 917 Wilson MH & Holzbaur ELF (2014b) Nesprins anchor kinesin-1 motors to the nucleus to drive nuclear  
918 distribution in muscle cells. *Development* **142**: 218–228
- 919 Zhang J, Zheng X, Yang X & Liao K (2009) CIN85 associates with endosomal membrane and binds phosphatidic  
920 acid. *Cell Research* **19**: 733–746
- 921

Figure 1

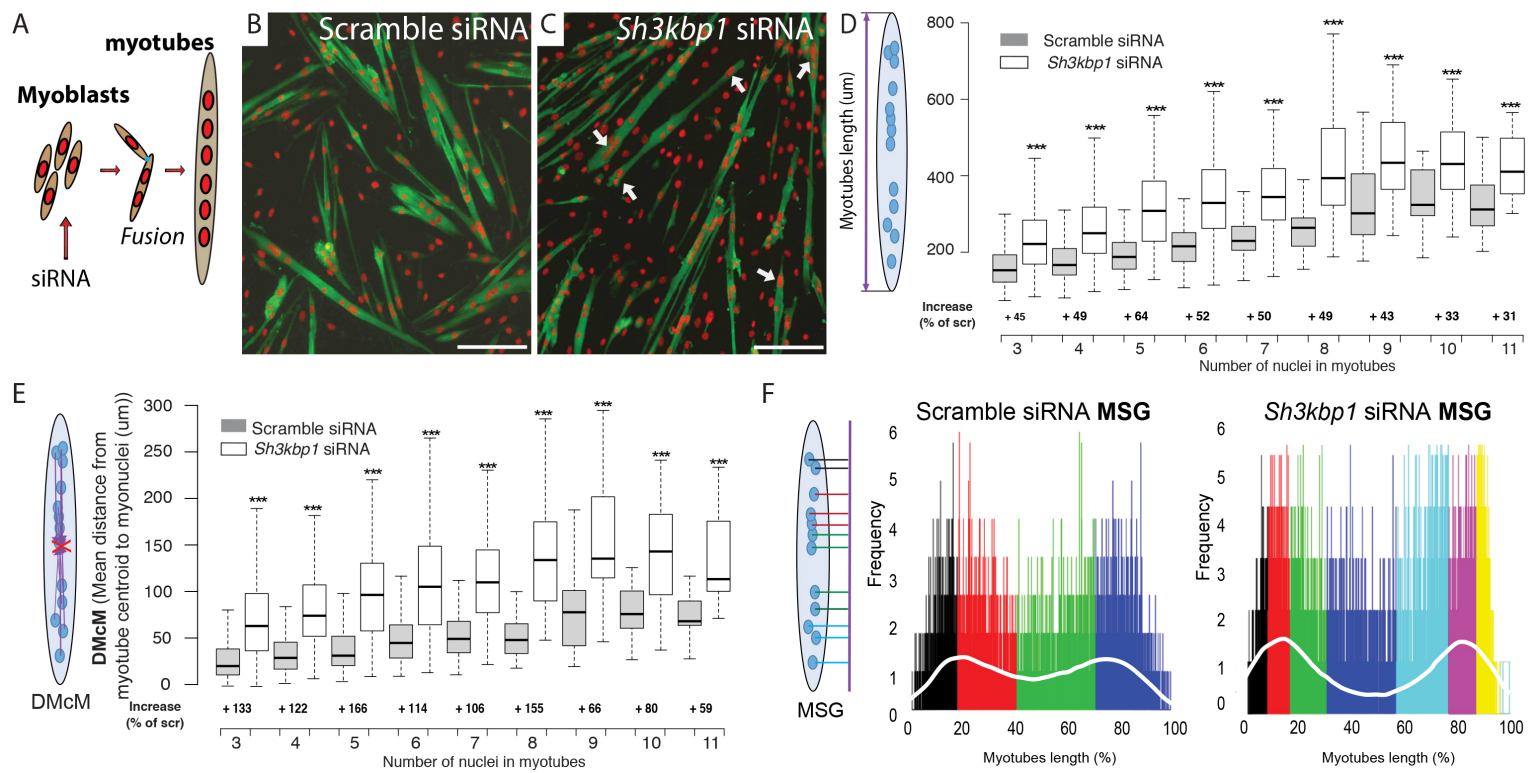

Figure 2

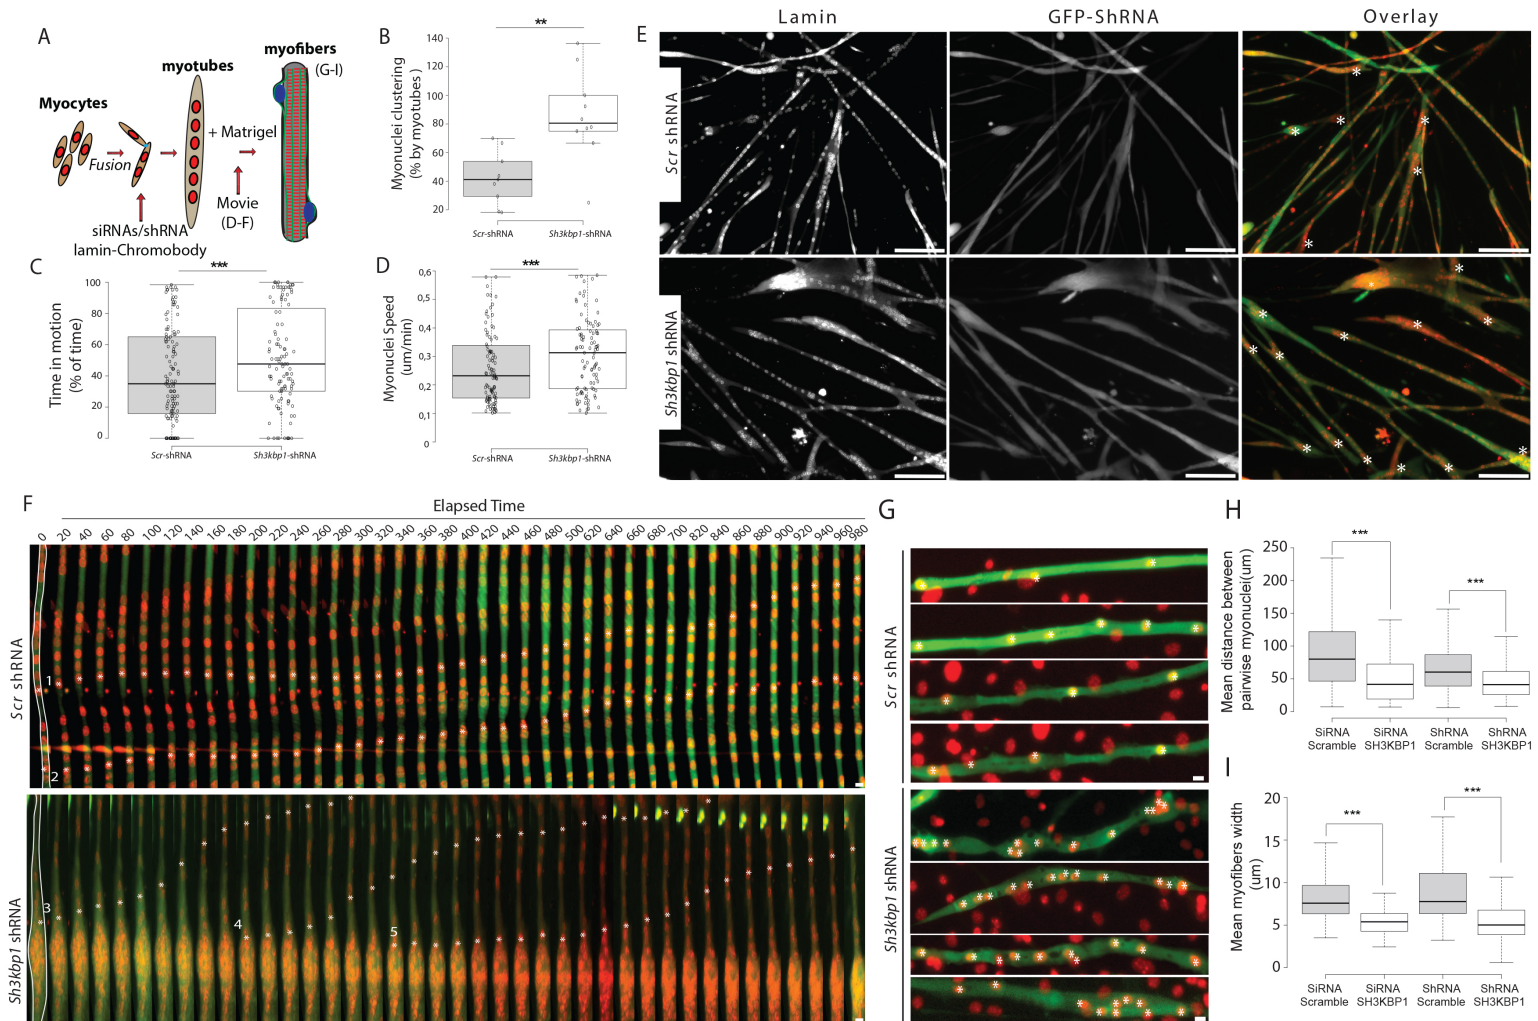



Figure 3

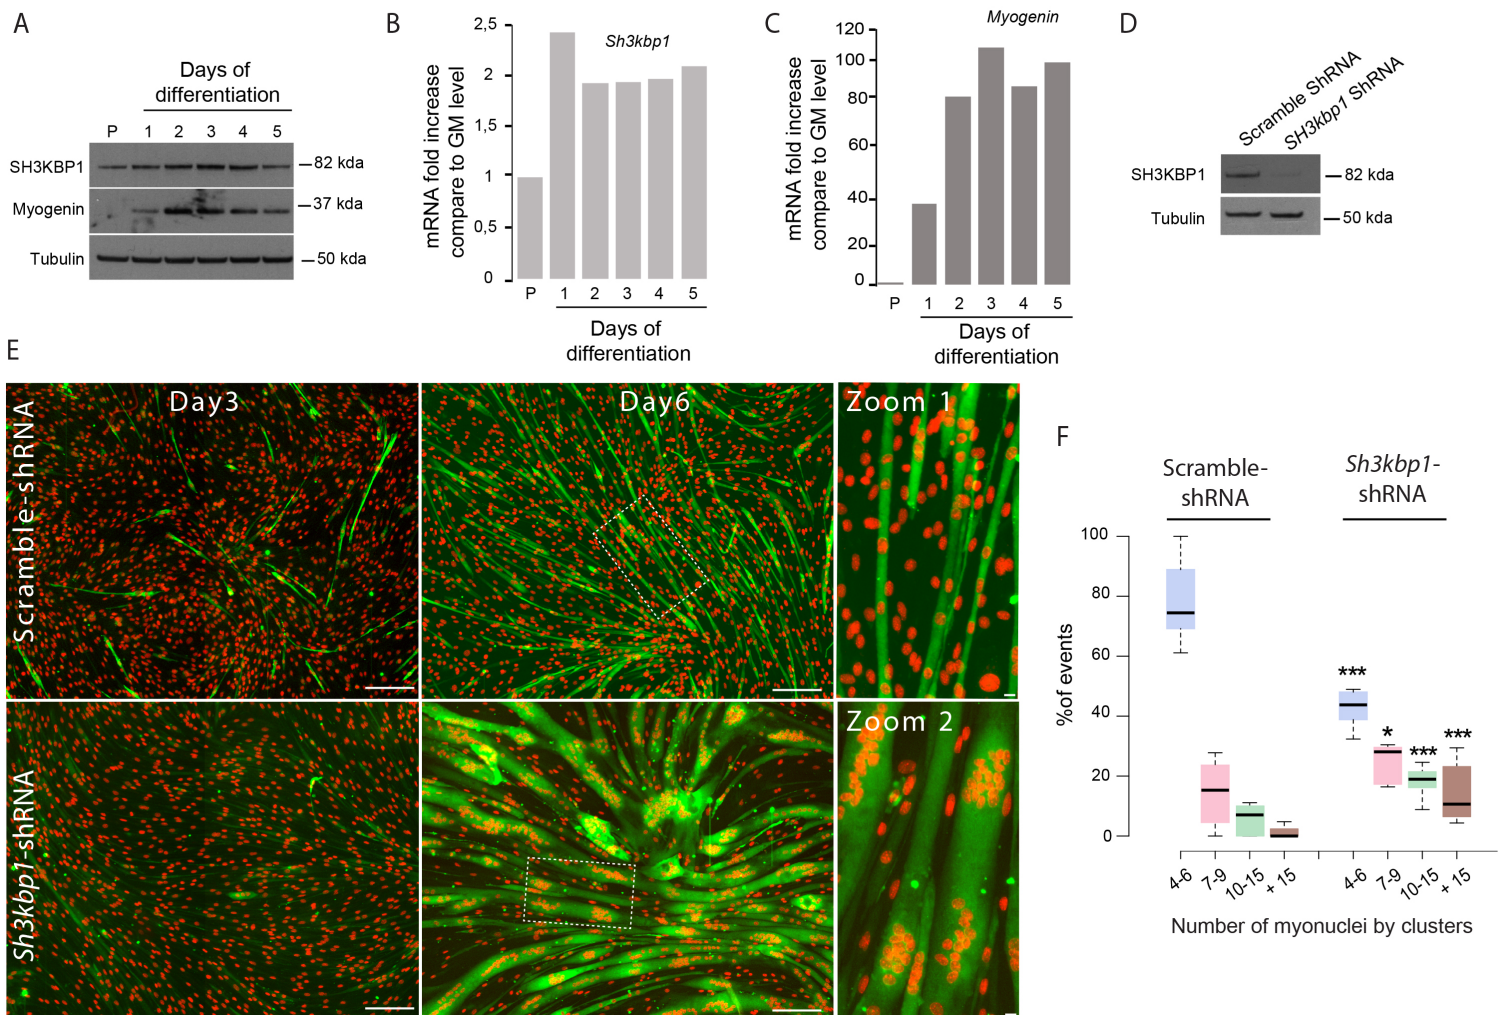



Figure 4

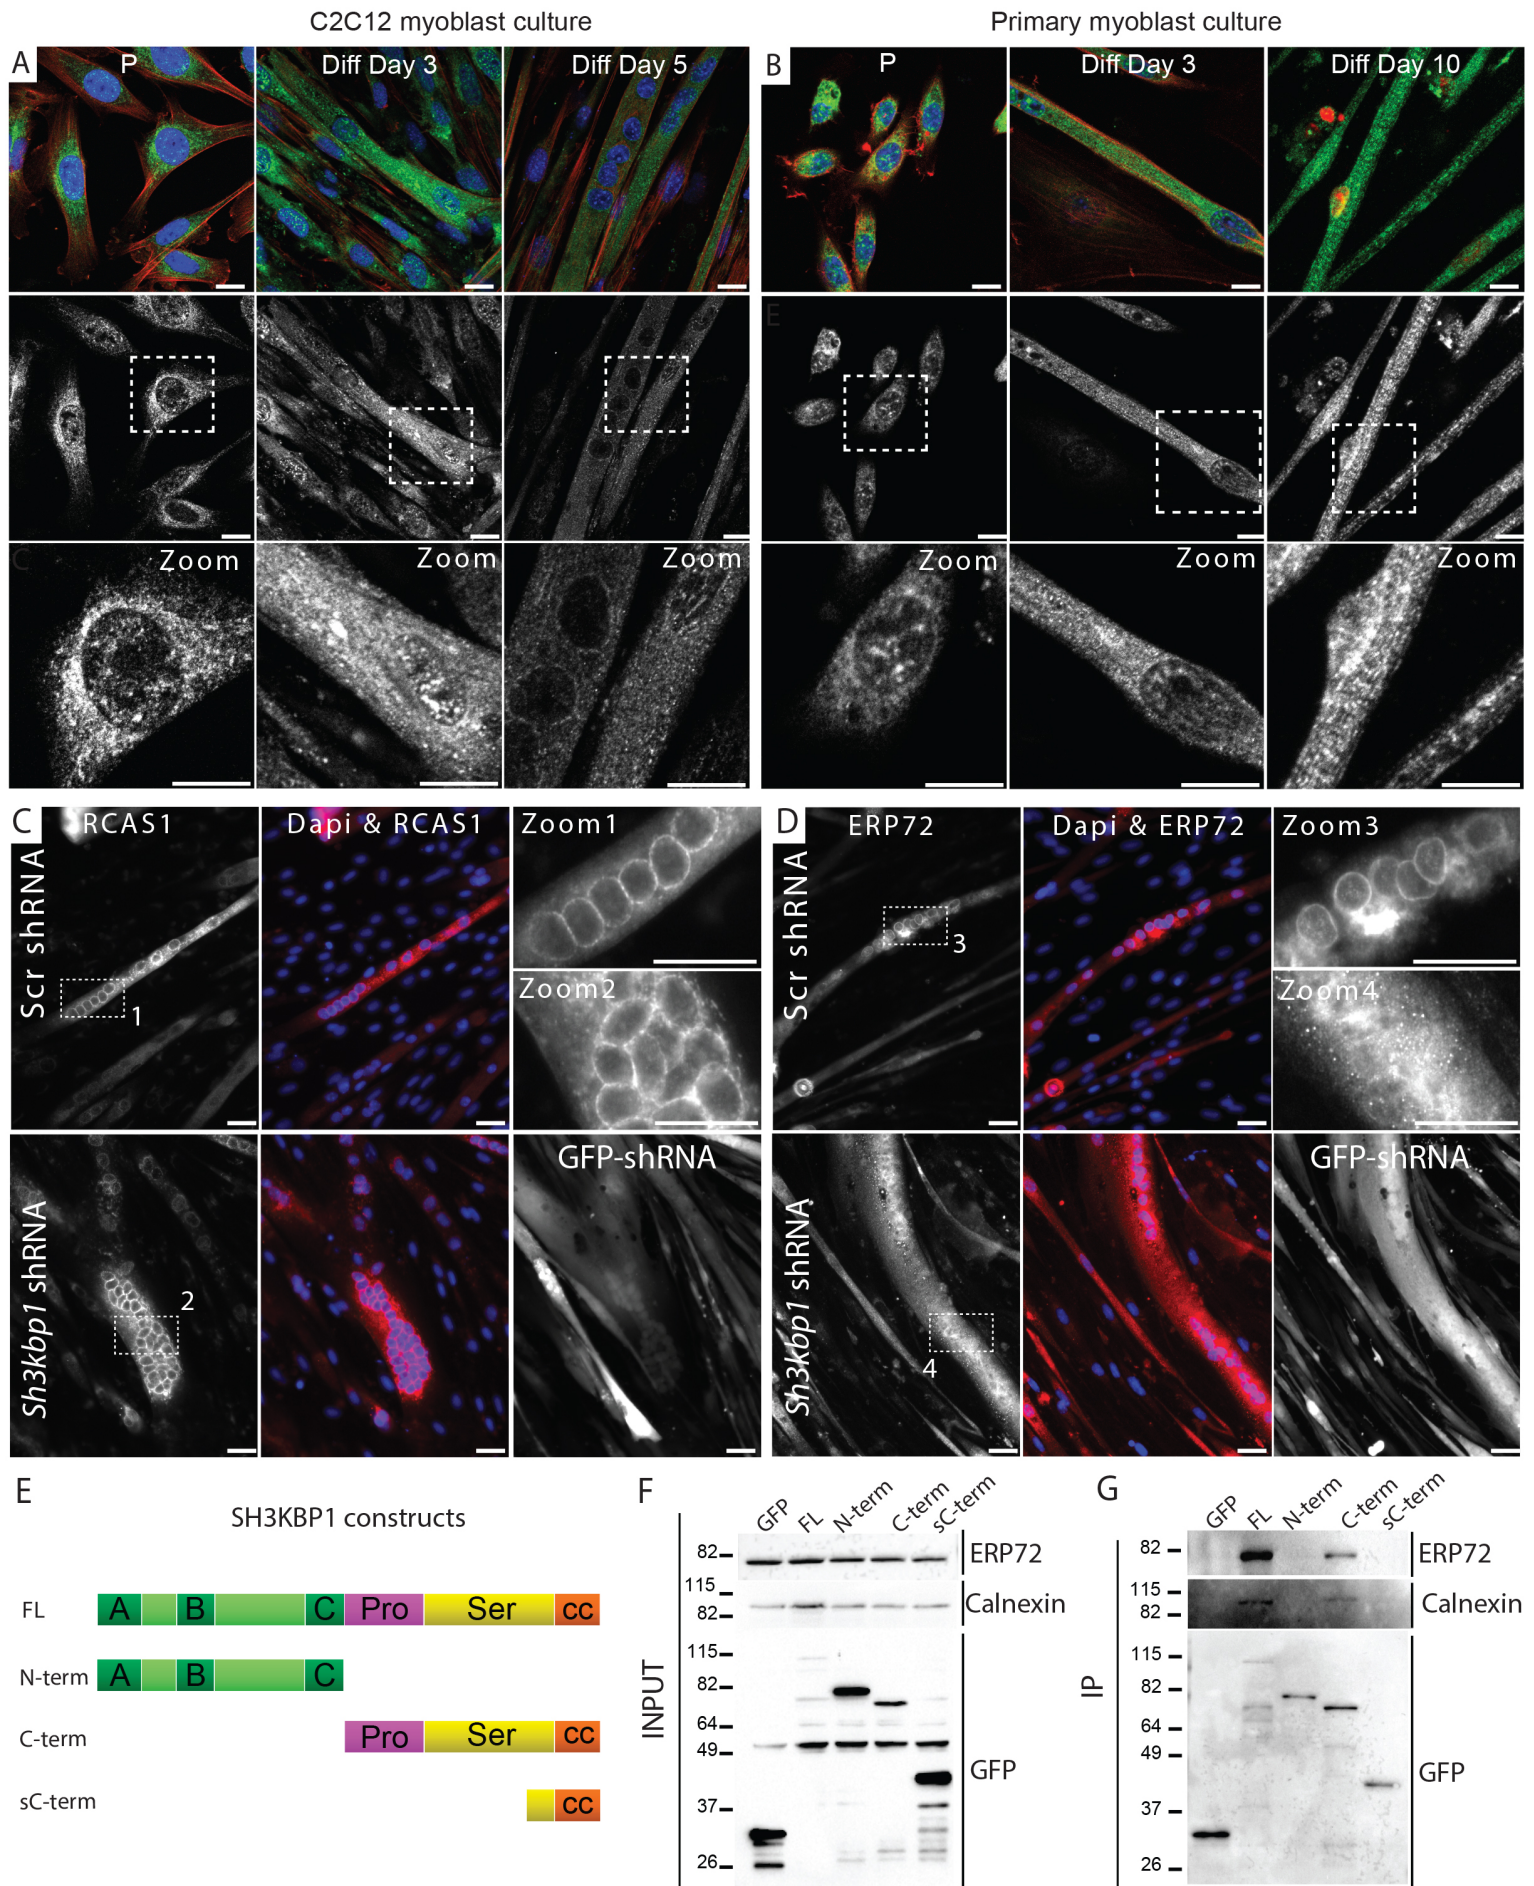



Figure 5

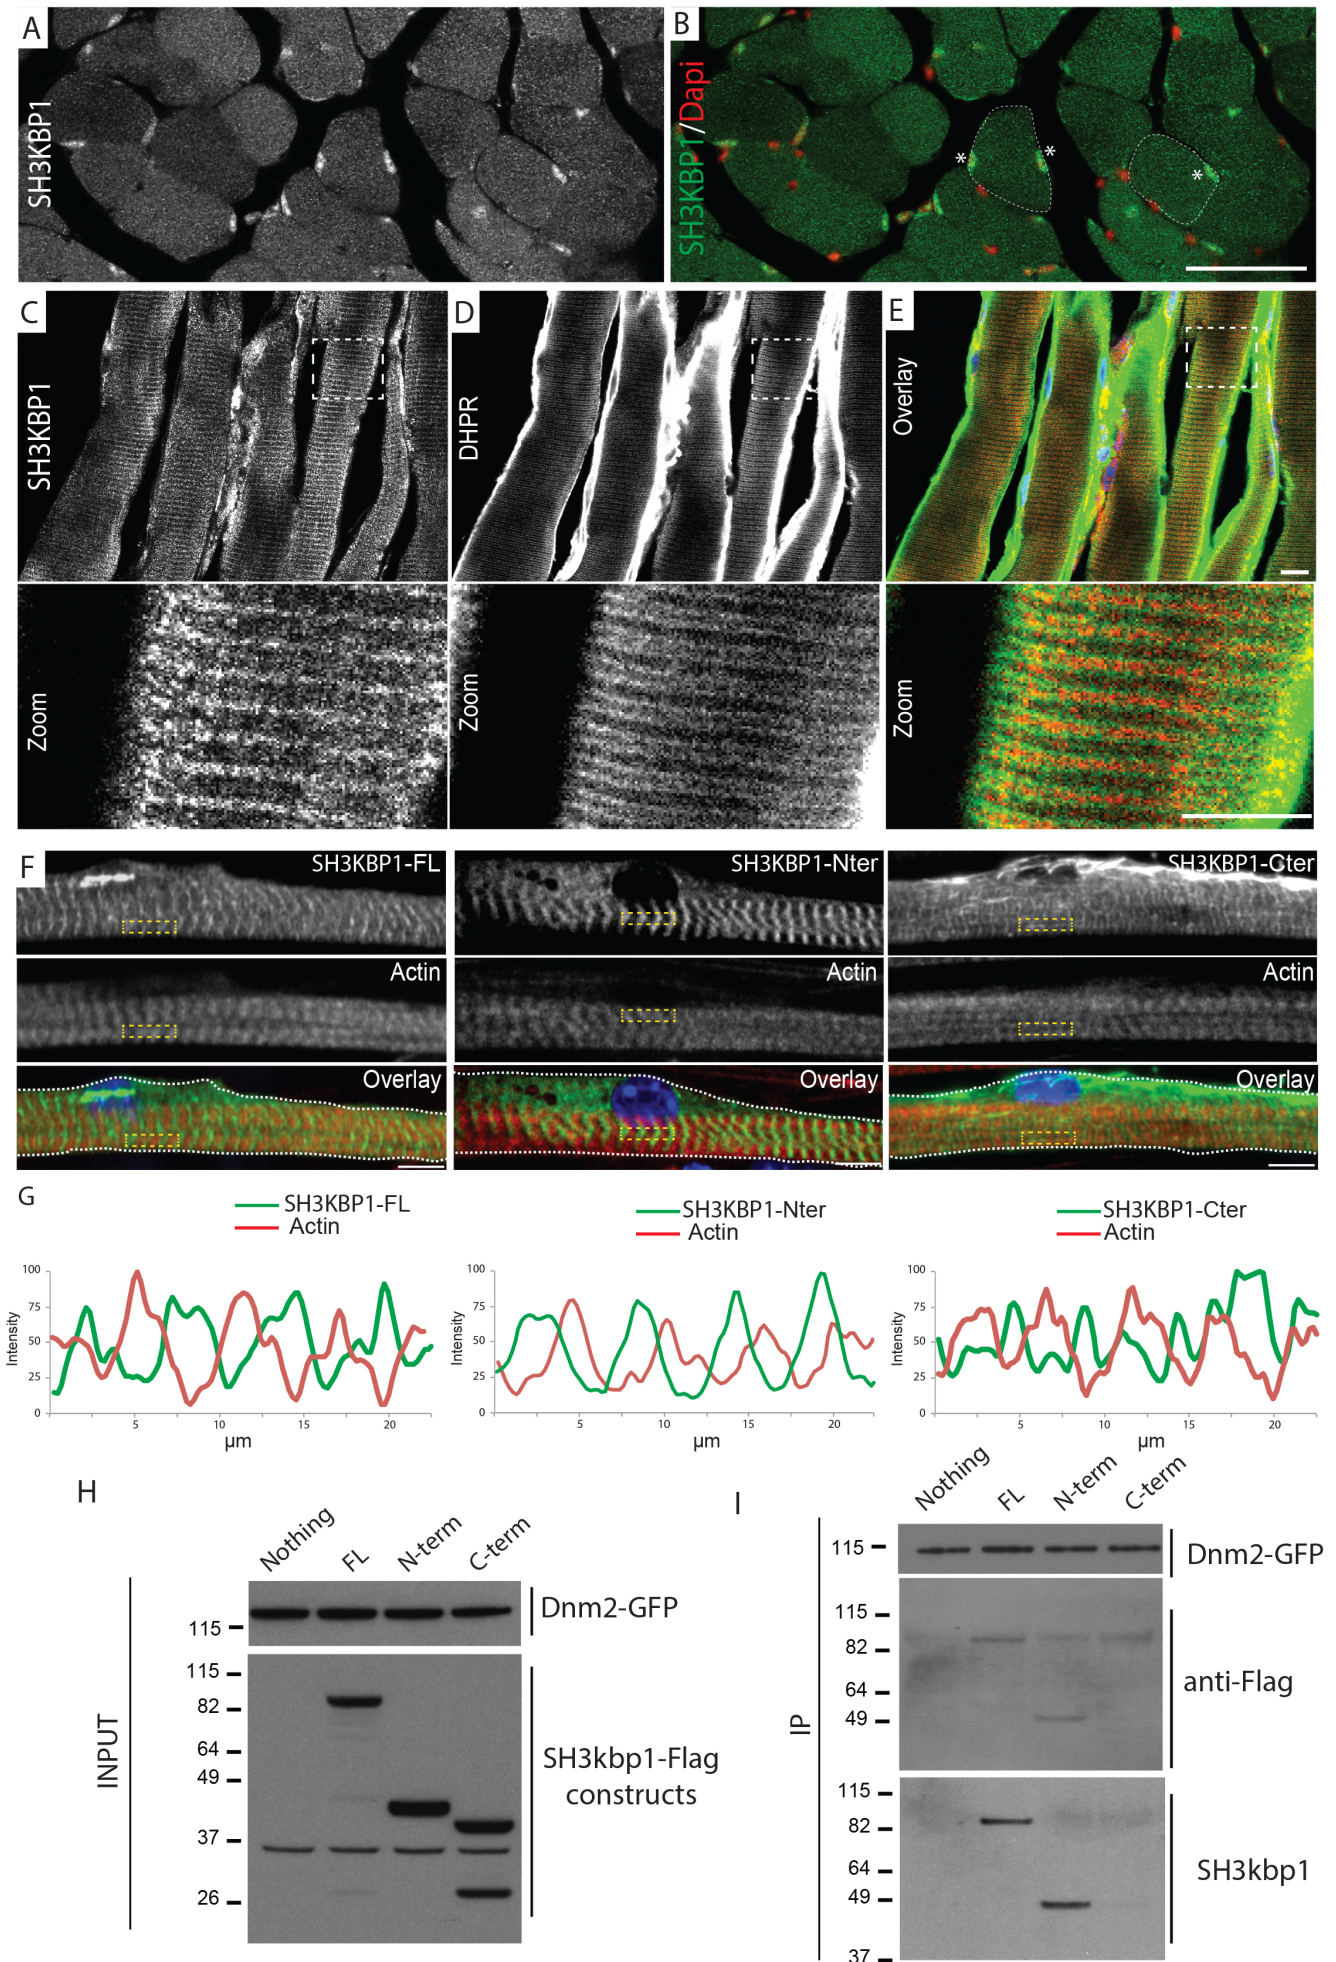



Figure 6

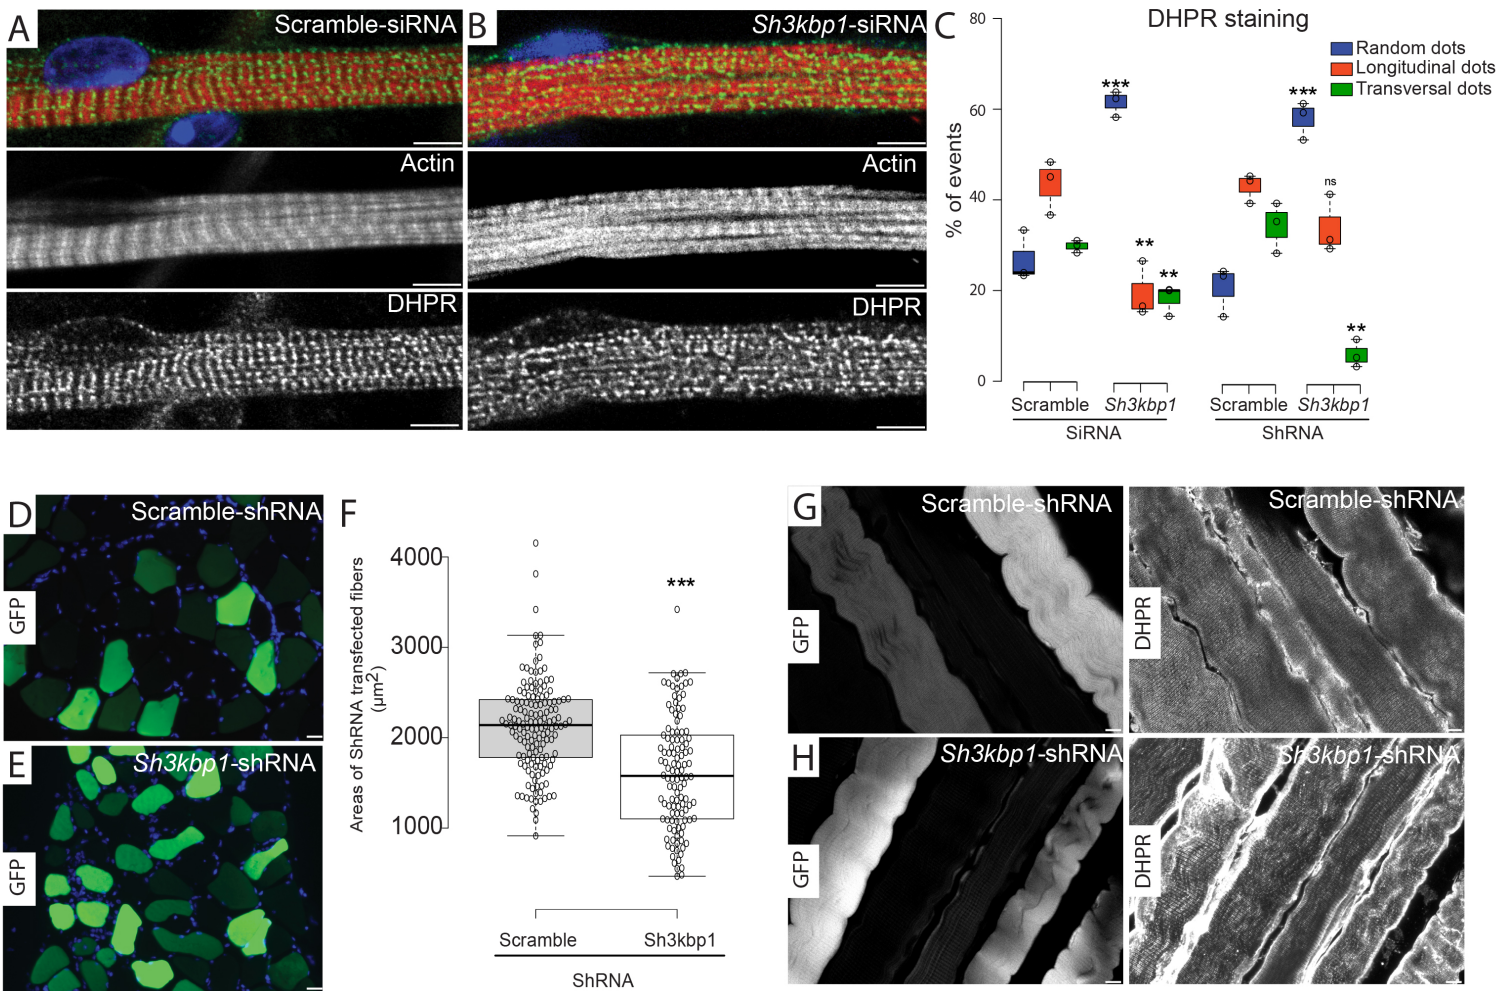

Figure 7

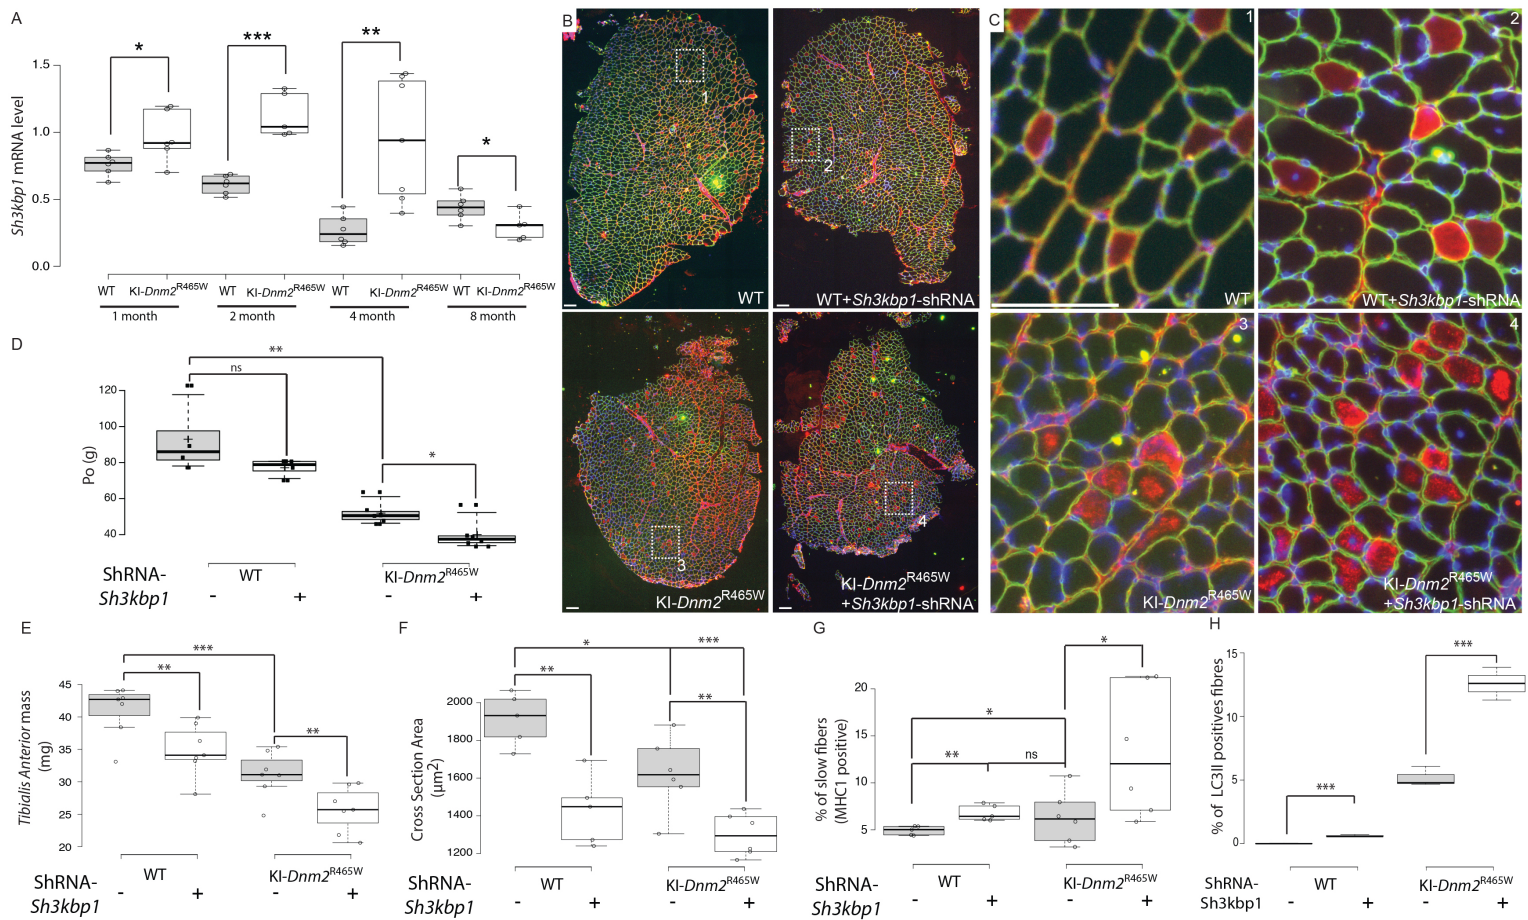

## Supplementary Figure 1

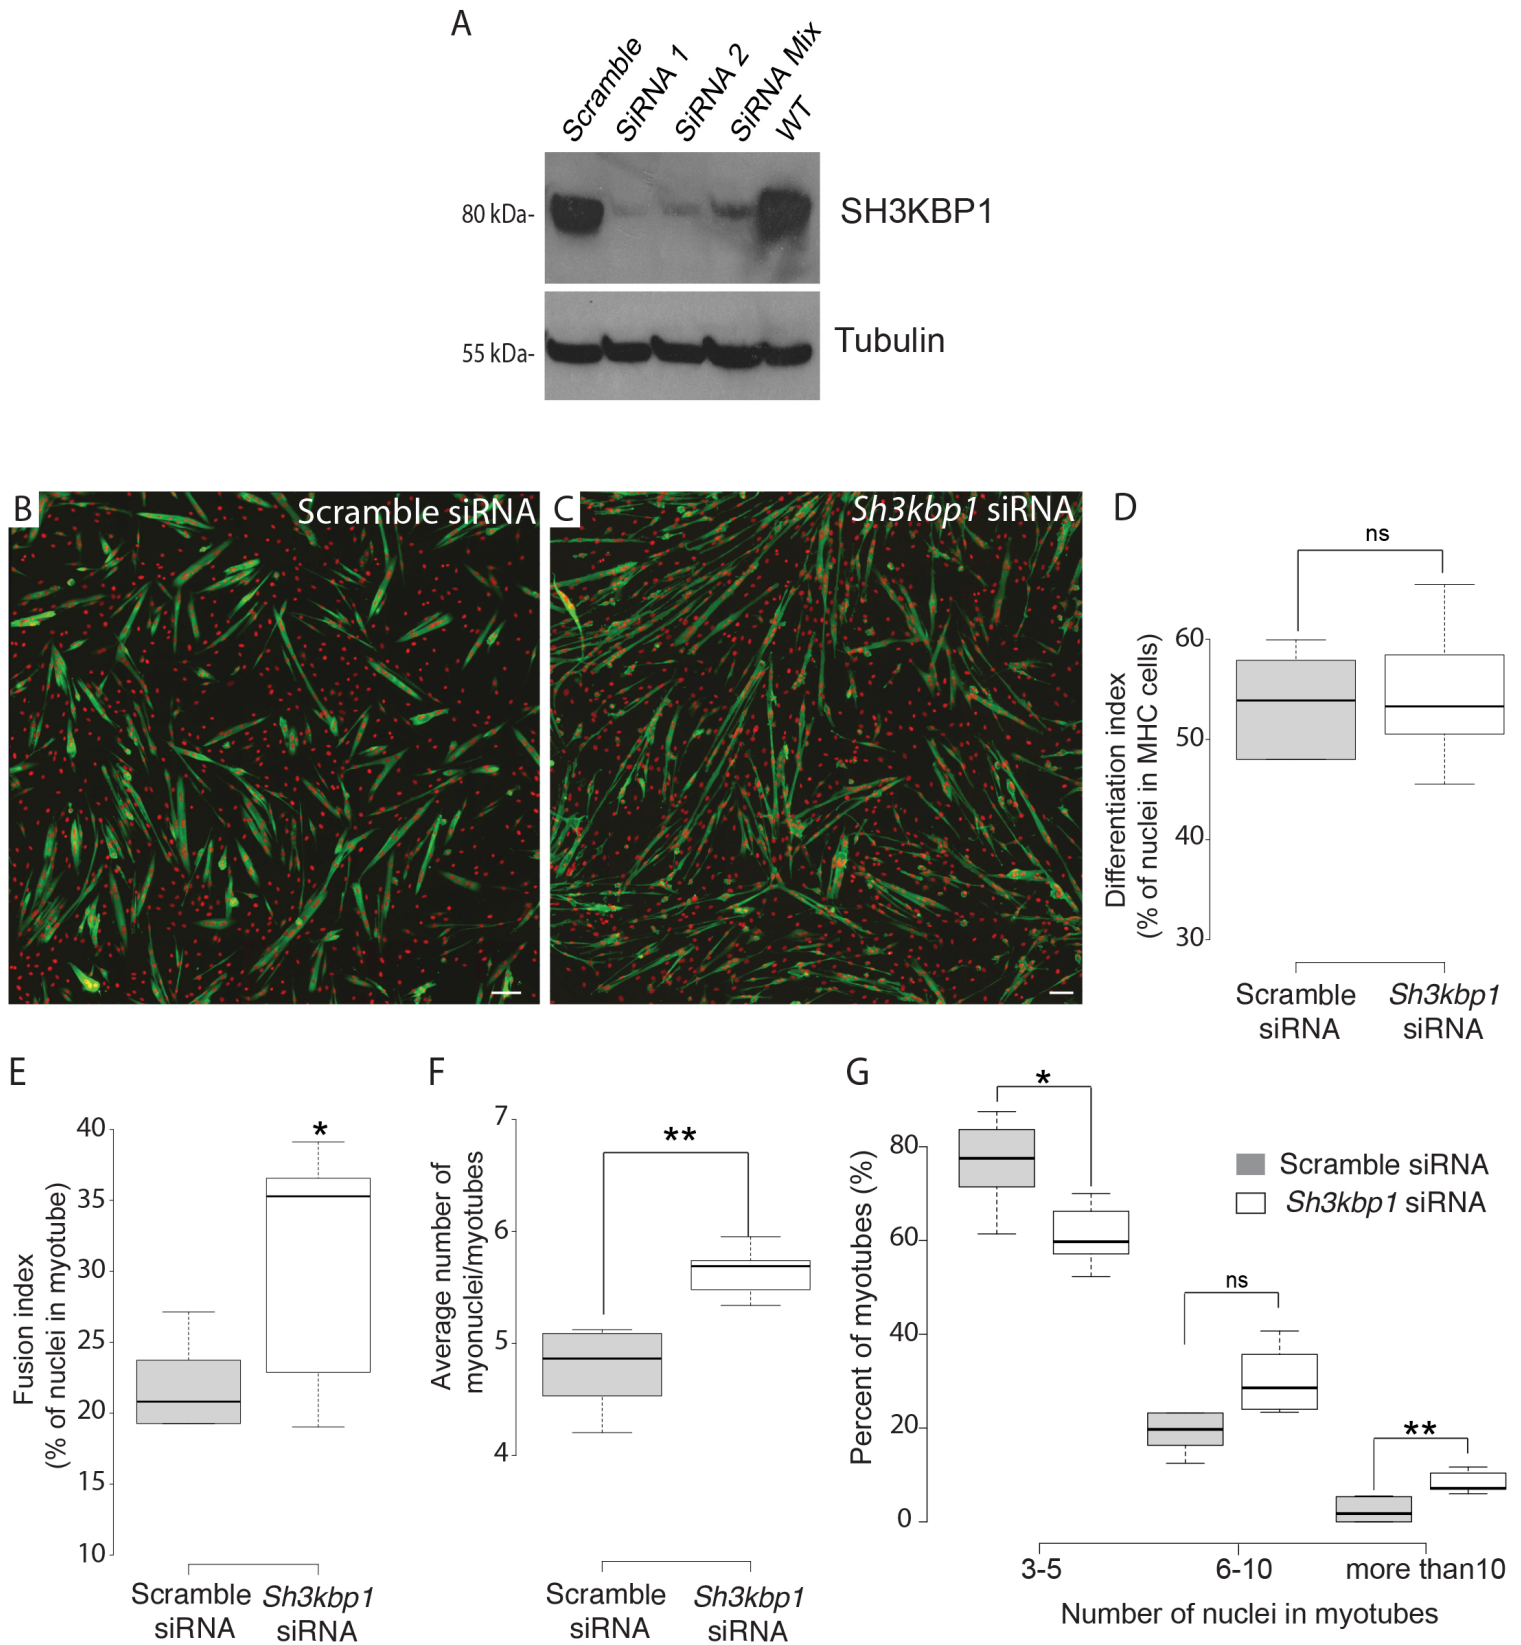



## Supplementary Figure 2

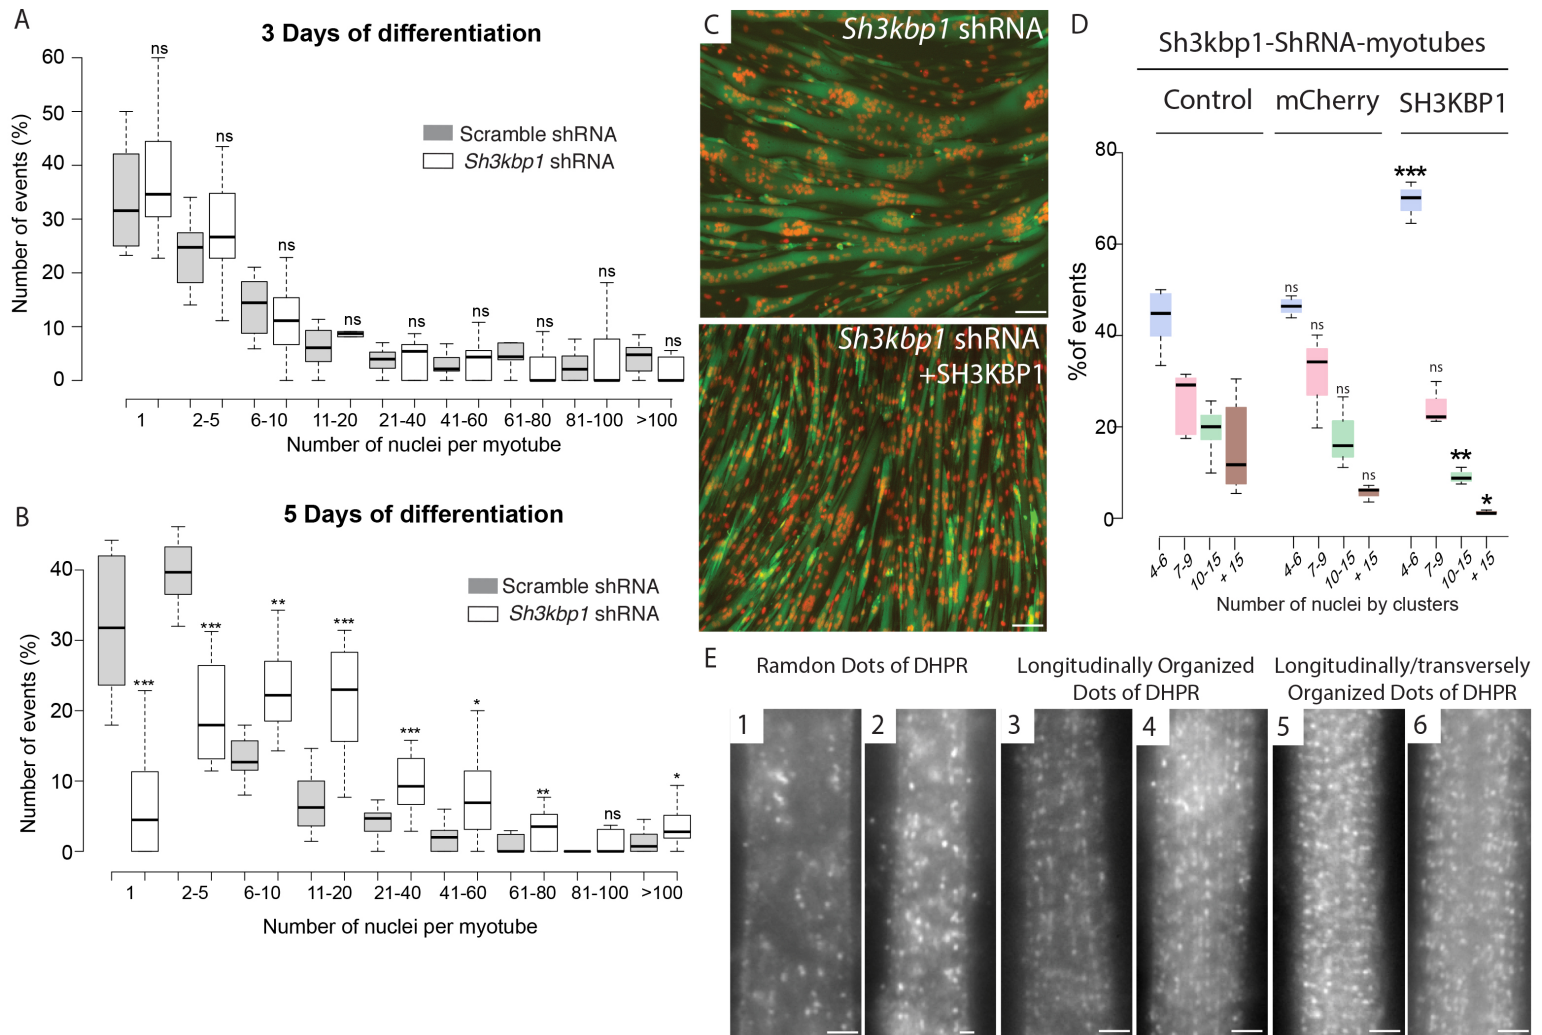



## Supplementary Figure 3

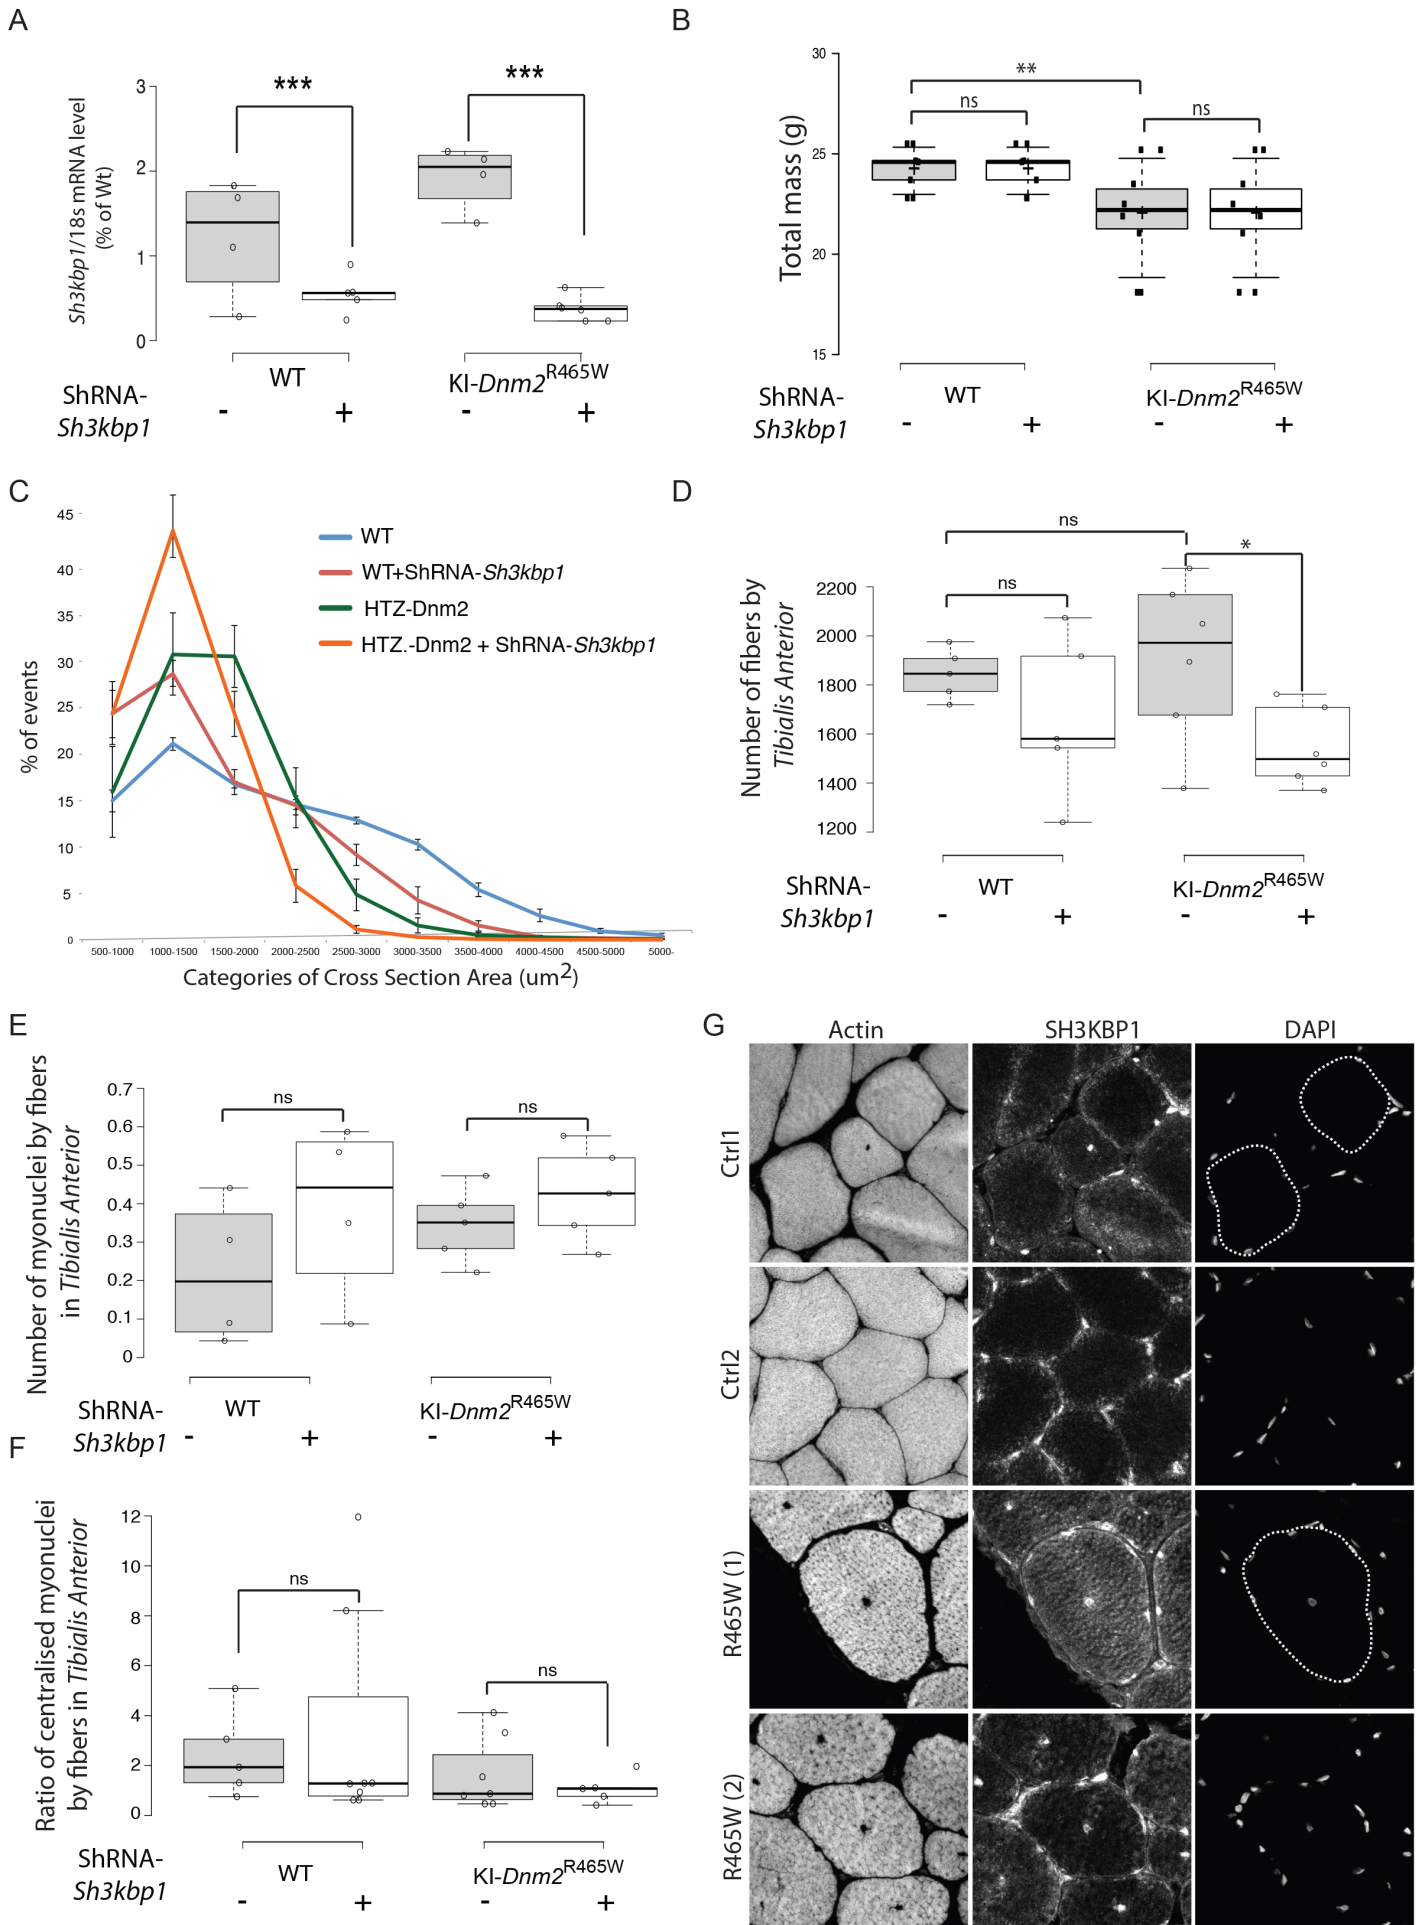

## Supplementary Table 1

### siRNA/shRNA sequence

| siRNA      | Sense oligonucleotide sequence | Anti-Sense oligonucleotide sequence |
|------------|--------------------------------|-------------------------------------|
| SH3KBP1 #1 | GGUUGUAGGAGAGGUAGAGtt          | CUCUACCUCUCCUACAACCtc               |
| SH3KBP1 #2 | GGUUUUGACUCUGUGAUAUtt          | AUAUCACAGAGUCAAAAACCtt              |
| SH3KBP1 #3 | GGUCGAUUGAAGUGGAAAAtt          | UUUUCCACUCAAUCGACCtt                |
| shRNA      | Clone Name                     | Target Sequence                     |
| SH3KBP1    | MSH032547-2-CU6(OS308398)      | ttacctccagctacatcaa                 |

### DNA constructs

| Name                     | Company/collaborators |
|--------------------------|-----------------------|
| SH3KBP1-Full length-GFP  | Buchman VL Lab Gift   |
| SH3KBP1-Full length-M2   | Buchman VL Lab Gift   |
| SH3KBP1-C-terminal-GFP   | Buchman VL Lab Gift   |
| SH3KBP1- C-terminal -M2  | Buchman VL Lab Gift   |
| SH3KBP1- N-terminal -GFP | Buchman VL Lab Gift   |
| SH3KBP1-N-terminal -M2   | Buchman VL Lab Gift   |
| SH3KBP1- CC -GFP         | Buchman VL Lab Gift   |
| SH3KBP1-CC -M2           | Buchman VL Lab Gift   |
| DNM2-GFP                 | Laporte J Lab Gift    |

### Primers sequences

| Primers   | Sequence              |
|-----------|-----------------------|
| SH3KBP1 F | AATACCGGTTCTTCCTCGGC  |
| SH3KBP1 R | CATCCTCCACCAACTCGGAC  |
| Gusb F    | GAGGATTGCCAACGAAACCG  |
| Gusb R    | GTGTCTGGGGACCACCTTTGA |
| GAPDH F   | AACTTTGGCATTGTGGAAGG  |
| GAPDH R   | ACACATTGGGGGTAGGAACA  |
| RpL4 F    | GCCATGAGAGCGAAGTGG    |
| RpL4 R    | CTCCTGCAGGCGTCGTAG    |

|         |         |                                |
|---------|---------|--------------------------------|
| 18 s    | Forward | CGC CGC TAG AGG TGA AAT C      |
|         | Reverse | CCA GTC GGC ATC GTT TAT GG     |
| Sh3Kbp1 | Forward | CCA TGC ACG ATG TAT CCA GTG    |
|         | Reverse | GTC GTT CTC CTC GTT TAT TGG TT |

## Supplementary Table 2

| Antibody or Dye                                                            | Species and Utility   | Dilution Factor | Manufacturer and Reference           |
|----------------------------------------------------------------------------|-----------------------|-----------------|--------------------------------------|
| Anti-SH3KBP1                                                               | Rabbit                | 1:100           | Sigma- HPA003355                     |
| Anti-SH3KBP1 (Cin85 H-300)                                                 | Rabbit                | 1:1000          | Santa Cruz, sc-48746                 |
| Anti-SH3KBP1<br>(SETA/Cin85/Ruk/SH3KBP1 Antibody<br>clone 179.1.E1) 05-731 | Mouse                 | 1:1000          | Merck 05-731                         |
| Anti- $\alpha$ -Tubulin                                                    | Mouse - primary       | 1:1000          | Sigma<br>T6074-200uL                 |
| Anti-myogenin (F5D)                                                        | Mouse                 | 1:100           | Santa Cruz sc-12732                  |
| Anti-RCAS1 (D2B6N)                                                         | Rabbit                | 1:200           | Cell Signaling #12290                |
| Anti-ERP72 ( <u>D70D12</u> )                                               | Rabbit                | 1:100           | Cell Signaling #5033                 |
| Anti-laminin                                                               | Rat                   | 1:200           | Sigma                                |
| Anti-GFP (3H9)                                                             | Rat                   | 1:1000          | Chromotek                            |
| Anti-Flag M2                                                               | Mouse                 | 1:1000          | Sigma F1804                          |
| Anti-Calnexin (C5C9)                                                       | Rabbit                | 1:100           | Cell Signaling #2679                 |
| Anti-LC3II/LC3I                                                            | Rabbit - primary      | 1:250           | Sigma L7543                          |
| Anti-Myosin skeletal slow                                                  | Mouse                 | 1:100           | Sigma M8421                          |
| MF20                                                                       | Mouse-primary         | 1:10            | DSHB                                 |
| Anti-DHPR                                                                  | Rabbit                | 1:10            | DSHB (IIID5E1)                       |
| Dapi-brilliant blue                                                        | Dye                   | 1:50000         | Thermo Fisher Scientifics<br>D1306   |
| Phalloidin-Alexa Fluor 647                                                 | Dye                   | 1:100           | Thermo Fisher Scientifics<br>A22287  |
| Anti-mouse-HRP                                                             | Goat - secondary      | 1:3000          | Invitrogen<br>62-6520                |
| Anti-rabbit-HRP                                                            | Goat -<br>secondary   | 1:3000          | Invitrogen<br>65-6120                |
| Anti-rat-<br>Alexa Fluor 488                                               | Donkey -<br>secondary | 1:500           | Thermo Fisher Scientifics<br>A-21208 |
| Anti-rabbit-<br>Alexa Fluor 647                                            | Goat -<br>secondary   | 1:500           | Thermo Fisher Scientifics<br>A-21245 |
| Anti-mouse-<br>Alexa Fluor 647                                             | Goat -<br>secondary   | 1:500           | Thermo Fisher Scientifics<br>A-21240 |
